1 Phylogenetics of a Rapid, Continental Radiation: Diversification, Biogeography, and  
2 Circumscription of the Beardtongues (*Penstemon*; Plantaginaceae)

3  
4 Andrea D. Wolfe<sup>1,\*</sup>, Paul D. Blischak<sup>1,3,4</sup>, and Laura S. Kubatko<sup>1,2</sup>

5  
6 <sup>1</sup>*Department of Evolution, Ecology, & Organismal Biology and* <sup>2</sup>*Department of Statistics, The*  
7 *Ohio State University, Columbus, OH, USA, 43210.* <sup>3</sup>*Department of Ecology & Evolutionary*  
8 *Biology and* <sup>4</sup>*Department of Molecular & Cellular Biology, University of Arizona, Tucson, AZ,*  
9 *USA, 85721.*

10  
11 **\*Corresponding author:** *Andrea D. Wolfe, Department of Evolution, Ecology, and Organismal*  
12 *Biology, The Ohio State University, 318 W. 12th Avenue, Columbus, OH, 43210, USA; E-mail:*  
13 [wolfe.205@osu.edu](mailto:wolfe.205@osu.edu).

14  
15 Running Head: PHYLOGENETICS OF THE *PENSTEMON* RADIATION

16  
17 *Abstract.*—*Penstemon* (Plantaginaceae), the largest genus of plants native to North America,  
18 represents a recent continental evolutionary radiation. We investigated patterns of  
19 diversification, phylogenetic relationships, and biogeography, and determined the age of the  
20 lineage using 43 nuclear gene loci. We also assessed the current taxonomic circumscription of  
21 the ca. 285 species by developing a phylogenetic taxonomic bootstrap method. *Penstemon*  
22 originated during the Pliocene/Pleistocene transition. Patterns of diversification and  
23 biogeography are associated with glaciation cycles during the Pleistocene, with the bulk of

24 diversification occurring from 1.0–0.5 mya. The radiation across the North American continent  
25 tracks the advance and retreat of major and minor glaciation cycles during the past 2.5 million  
26 years with founder-event speciation contributing the most to diversification of *Penstemon*. Our  
27 taxonomic bootstrap analyses suggest the current circumscription of the genus is in need of  
28 revision. We propose rearrangement of subgenera, sections, and subsections based on our  
29 phylogenetic results. Given the young age and broad distribution of *Penstemon* across North  
30 America, it offers an excellent system for studying a rapid evolutionary radiation in a continental  
31 setting.

32

33 Key words: biogeography, diversification, evolutionary radiation, *Penstemon*, taxonomy

34 *Penstemon* Schmidel (Plantaginaceae), commonly known as the beardtongues, is the largest  
35 plant genus endemic to the North American continent, containing ca. 285 species, with new taxa  
36 being described every few years (Turner 2010; Estes 2012; O’Kane and Heil 2014; Zacarías-  
37 Correa et al. 2019). The recent publication of the Flora of North America treatment for the genus  
38 (Freeman 2019) included 239 species found north of the US/Mexico border. Mexico has ca. 60  
39 species (Zacarías-Correa 2020). This large and diverse genus is an example of a rapid  
40 evolutionary radiation, with much of the diversification hypothesized to have taken place during  
41 the Pleistocene (Wolfe et al. 2006). Most of the species are found in the Intermountain West  
42 (Holmgren 1984; Holmgren and Holmgren 2016), with the number of species decreasing  
43 dramatically east of the Rocky Mountains. For example, the Great Plains region to the  
44 Mississippi River contain ca. 39 species, with an additional 10 species found only east of the  
45 Mississippi (Lindgren and Wilde 2003). In contrast, Utah has 76 species, with ca. 29 percent  
46 endemic to the state (Holmgren 1984; Stevens et al. 2020).

47       Species of *Penstemon* occur in a wide variety of habitats, including edaphic  
48 specialization (e.g., deep sand, limestone derived soils, igneous soils, oil shales), with most  
49 species adapted to xeric landscapes (Lindgren and Wilde 2003; Dockter et al. 2013). The  
50 diversity of floral shapes, sizes, and colors suggests a significant role of pollinator selective  
51 pressure in the evolutionary history of the genus (Pennell 1935; Straw 1956a, 1956b, 1963).  
52 Other morphological traits with high levels of variation include size, habit, inflorescence, leaves,  
53 anthers, and staminodes. Most of the species are restricted to narrow ranges, with about 1/3 of  
54 the species restricted to a single state in the United States or Mexico. Habitat specialization,  
55 combined with narrow geographic distribution, has resulted in conservation concerns for many  
56 species (Wolfe et al. 2014, 2016; Rodriguez-Peña et al. 2018; Stone et al. 2019; Zacarías-Correa

57 et al. 2020). *Penstemon penlandii*, *P. haydenii*, and *P. debilis* have been Federally listed as  
58 endangered or threatened under the US Endangered Species Act (USFWS 2011), with more than  
59 90 species under consideration for protection (USFWS 1993).

60 The taxonomy of the genus has been developed over the past 250 years, since its  
61 recognized designation by Schmidel (1763). Earlier work included a description by John  
62 Mitchell, which was published in 1748 (Straw 1966), but his work is not currently recognized as  
63 establishing the genus (Freeman 2019). The most comprehensive listings of *Penstemon*  
64 taxonomy have been compiled by the American Penstemon Society in a series of publications  
65 that were most recently updated nearly 20 years ago (Lodewick and Lodewick 1987; Lindgren  
66 and Wilde 2003). Because the Flora of North America treatment by Freeman (2019) did not  
67 address the taxonomy of the genus, we will refer to the taxonomic designations from Lindgren  
68 and Wilde (2003), amended with information from the updated *Penstemon* treatments in  
69 Volumes Four and Seven of *The Intermountain Flora* (Holmgren 1984; Holmgren and Holmgren  
70 2016).

71 The most comprehensive phylogenetic study for *Penstemon* was published by Wolfe et  
72 al. (2006) and included 163 species representing all subgenera and sections of the genus. This  
73 study used ITS and two cpDNA loci and was able to establish some major trends in the  
74 evolutionary patterns for the genus such as 1) the rapid evolutionary radiation of a large genus in  
75 a continental setting, 2) biogeographic trends across North America, 3) a probable role in  
76 diversification due to hybridization, and 4) the independent derivation of a hummingbird  
77 pollination syndrome in at least 10 lineages. Taxonomic trends observed in the 2006 study  
78 included strong support for the circumscription of subgenus *Dasanthera* as the earliest diverging  
79 lineage, and close affinities among some sections of subgenera *Saccanthera* and *Penstemon*, and

80 *Penstemon* and *Habroanthus*. The resolution of the backbone for the tree was insufficient to fully  
81 resolve taxonomic relationships, but indications for non-monophyly for three of the four multi-  
82 taxa subgenera were present.

83         Recent phylogenetic studies for *Penstemon* have focused on the core group of species  
84 encompassing sections *Gentianoides*, *Coerulei*, *Spectabiles*, and members of what has  
85 traditionally been known as subgenus *Habroanthus* (Crosswhite 1967; Wessinger et al. 2016,  
86 2019). The Wessinger et al. (2016, 2019) studies employed multiplexed shotgun genotyping  
87 (MSG) SNP data for 75 and 120 species, respectively. The phylogenies based on MSG data had  
88 more resolution than did the trees presented in the Wolfe et al. (2006) study but were mostly in  
89 agreement with clade topologies of the earlier tree, and the trees were specifically used as a  
90 framework for understanding the evolutionary trends in the shift between bee- to bird-pollination  
91 syndromes.

92         In the Flora of North America, including most of the species of *Penstemon*, Freeman  
93 (2019) revised the taxonomy of genus to include only two subgenera (*Dasanthera* and  
94 *Penstemon*), based on the phylogenetic results from Wolfe et al. (2006). In addition to  
95 subsuming four subgenera, the number of sections was reduced, and there were no divisions  
96 below the sectional level. This resulted in the small subgenus *Dasanthera* circumscribing only  
97 nine species including *P. personatus*, formerly placed in a monotypic subgenus (*Cryptostemon*),  
98 and the remainder of the genus circumscribing subgenus *Penstemon*.

99         In this study we expand the phylogenetic survey to include 239 species of *Penstemon*  
100 with the intent to examine the correspondence of historical and contemporary taxonomic  
101 boundaries. With the expanded phylogenetic survey, we also address the age of the genus,

102 patterns of diversification, and biogeographic trends, and we compare our results to previous  
103 phylogenetic surveys for *Penstemon*.

104

## 105 MATERIALS AND METHODS

106

### 107 *Sample Collection, DNA Extraction, and Amplicon Sequencing*

108 DNA was extracted from a combination of either field-collected, silica-dried leaf tissue or leaves  
109 sampled from herbarium specimens using a modified CTAB protocol for DNA isolation (Wolfe  
110 2005). After extraction, all samples were quantified using a Qubit fluorometer (Invitrogen,  
111 Carlsbad, CA, USA) and normalized to a concentration of 20 ng/ $\mu$ L. Normalized DNA samples  
112 for the 282 accessions of *Penstemon* representing 239 species plus two hybrids (ca. 84% of the  
113 genus) used in this study, plus nine accessions from other members of the tribe Cheloneae (one  
114 *Pennelianthus*, five *Keckiella*, one *Nothochelone*, one *Chelone*, and one *Chionophila*), were sent  
115 to the IBEST Genomics Resource Core at the University of Idaho (Moscow, ID, USA) for  
116 sample preparation and amplicon sequencing (Appendix 1). All subgenera, sections, and  
117 subsections of *Penstemon* were represented in the sampling (Table 1). Amplification of targeted  
118 regions and the addition of sample barcodes and Illumina adapters was done using microfluidic  
119 PCR on the Fluidigm 48x48 Access Array (Fluidigm Corporation, South San Francisco, CA,  
120 USA), followed by 300 bp, paired-end sequencing on an Illumina MiSeq (Illumina, San Diego,  
121 CA, USA) (Uribe-Convers et al. 2016). Primers for the 48 loci used in this study were designed  
122 and tested as described in Blischak et al. (2014) and are given in Table S1. Raw, paired-end  
123 sequencing reads were demultiplexed with dbcAmplicons  
124 [<https://github.com/msettles/dbcAmplicons>] prior to being returned from IBEST (Uribe-Convers

125 Table 1. Taxonomy of *Penstemon* as recognized by the American Penstemon Society, with annotations from the  
 126 Freeman (2019) Flora of North America Treatment. Sampling of species for this study is indicated in the numerator,  
 127 and abbreviations are those used in Figure 1.  
 128

| Subgenus            | Section                                      | Subsection             | Abbreviations       | Species Sampling         | FNA designations                                                               |                             |
|---------------------|----------------------------------------------|------------------------|---------------------|--------------------------|--------------------------------------------------------------------------------|-----------------------------|
| <i>Cryptostemon</i> |                                              |                        | C                   | 1/1                      | Subg.<br>Dasanthera                                                            |                             |
| <i>Dasanthera</i>   |                                              |                        | D                   | 9/9                      |                                                                                |                             |
| <i>Dissecti</i>     |                                              |                        | Di                  | 1/1                      |                                                                                |                             |
| <i>Habroanthus</i>  | <i>Elmigera</i>                              |                        | H, El               | 6/7                      |                                                                                |                             |
|                     | <i>Glabri</i>                                |                        | H, Gl               | 34/44                    |                                                                                |                             |
| <i>Penstemon</i>    | <i>Ambigui</i>                               |                        | P, A                | 1/2                      |                                                                                |                             |
|                     | <i>Baccharifolii</i>                         |                        | P, B                | 1/1                      |                                                                                |                             |
|                     | <i>Chamaeleon</i>                            |                        | P, Ch               | 3/4                      |                                                                                |                             |
|                     | <i>Coerulei</i>                              |                        | P, Co               | 20/20                    |                                                                                |                             |
|                     | <i>Cristati</i>                              |                        | P, Cr               | 24/28                    | 3 spp<br>transferred from<br>sect. <i>Ericopsis</i>                            |                             |
|                     | <i>Ericopsis</i>                             | <i>Caespitosi</i>      | P, E, Ca            | 12/12                    | sect. <i>Caespitosi</i><br>(2 spp<br>transferred to<br>sect. <i>Cristati</i> ) |                             |
|                     |                                              | <i>Ericopsis</i>       | P, E, E             | 1/1                      | sect. <i>Cristati</i>                                                          |                             |
|                     | <i>Linarioides</i>                           | P, E, L                | 3/3                 | sect. <i>Caespitosi</i>  |                                                                                |                             |
| <i>Fasciculus</i>   | <i>Campanulati</i>                           |                        | P, F, Cp            | 5/8                      |                                                                                |                             |
|                     | <i>Fasciculi</i>                             |                        | P, F, Fa            | 10/13                    |                                                                                |                             |
|                     | <i>Perfoliati</i>                            |                        | P, F, Pf            | 1/3                      |                                                                                |                             |
|                     | <i>Racemosi</i>                              |                        | P, F, R             | 4/4                      |                                                                                |                             |
|                     | <i>Peltanthera</i>                           | <i>Centranthifolii</i> | P, Pe, Ce           | 10/10                    | sect.<br><i>Gentianoides</i>                                                   |                             |
|                     | <i>Havardiani</i>                            | P, Pe, Hv              | 1/3                 |                          |                                                                                |                             |
|                     | <i>Peltanthera</i><br>( <i>Spectabiles</i> ) | P, Pe, Sp              | 14/16               | sect. <i>Spectabiles</i> |                                                                                |                             |
|                     | <i>Petioliati</i>                            | P, Pe, Pt              | 1/1                 | sect. <i>Petioliati</i>  |                                                                                |                             |
| <i>Penstemon</i>    | <i>Arenarii</i>                              |                        | P, P, Ar            | 1/2                      | sect. <i>Penstemon</i>                                                         |                             |
|                     | <i>Deusti</i>                                |                        | P, P, De            | 3/3                      |                                                                                |                             |
|                     | <i>Gairdneriani</i>                          |                        | P, P, G             | 2/2                      |                                                                                |                             |
|                     | <i>Harbouriani</i>                           |                        | P, P, Ha            | 1/1                      |                                                                                |                             |
|                     | <i>Humiles</i>                               |                        | P, P, Hu            | 15/20                    |                                                                                |                             |
|                     | <i>Multiflori</i>                            |                        | P, P, M             | 1/1                      |                                                                                |                             |
|                     | <i>Penstemon</i>                             |                        | P, P, P             | 10/18                    |                                                                                |                             |
|                     | <i>Proceri</i>                               |                        | P, P, Pr            | 16/17                    |                                                                                |                             |
|                     | <i>Tubaeflori</i>                            |                        | P, P, T             | 1/1                      |                                                                                |                             |
|                     | <i>Saccanthera</i>                           | <i>Bridgesiani</i>     |                     | S, B                     | 1/1                                                                            |                             |
|                     |                                              | <i>Saccanthera</i>     | <i>Heterophylli</i> | S, S, He                 | 20/22                                                                          | sect.<br><i>Saccanthera</i> |
|                     |                                              | <i>Serrulati</i>       | S, S, Se            | 6/6                      | Sect.<br><i>Saccanthera</i>                                                    |                             |

Total = 239/285

129

130

131 et al. 2016). We then processed the sequence data using Fluidigm2PURC v0.2.1  
132 [<https://github.com/pblischak/fluidigm2pure>] (Blischak et al. 2018) to assemble and align  
133 haplotypes for phylogenetic inference (Rothfels et al. 2017). The initial, unfiltered haplotype  
134 data returned by Fluidigm2PURC was further processed in Geneious v8.1.9 (Kearse et al. 2012).  
135 Each locus was first realigned in Geneious using MUSCLE with default settings (Edgar 2004),  
136 after which we removed poorly aligned sequences, as well as a small number of duplicated  
137 accessions that were repeated across sequencing runs.

138

### 139 *Phylogenetic Inference*

140 To infer a phylogeny for *Penstemon*, we used a coalescent-based approach. We inferred  
141 individual gene trees for each locus using FastTree v2.1.11 (Price et al. 2010), which we then  
142 used as input for ASTRAL v5.6.3 (ASTRAL-III; Zhang et al. 2018). Gene trees were inferred  
143 using the GTR+GAMMA model and ASTRAL-III was run using default options. We also ran a  
144 concatenation-based, maximum likelihood (ML) analysis using RAxML v8.2.10 (Stamatakis  
145 2014). For our ML analysis, we concatenated all processed and aligned sequences using  
146 Phyutility v2.7.1 (Smith and Dunn 2008), fit separate GTR+GAMMA parameters for each gene  
147 using a partitions file, and performed 1000 rounds of rapid bootstrapping to assess support  
148 (Stamatakis et al. 2008). Previous phylogenetic work has placed *Pennellianthus frutescens* as  
149 sister to the rest of the Cheloneae, and we used it here as an outgroup for both analyses (Wolfe et  
150 al. 2002, 2006).

151

152

153



154 *Taxonomic Bootstrap*

155 To assess support for the current taxonomic classification of *Penstemon* at the level of subgenus,  
156 section, and subsection, we performed bootstrap resampling of taxa from within their respective  
157 taxonomic ranks. For an individual bootstrap replicate, a single representative was sampled from  
158 each named group at the chosen taxonomic rank and a phylogeny was inferred using these  
159 individuals' sequence data. At each taxonomic level (subgenus, section, and subsection), we  
160 performed 1000 rounds of bootstrap resampling with phylogenetic inference conducted using  
161 SVDQuartets (Chifman and Kubatko 2014) on each bootstrapped data set. Replicates were then  
162 combined into a majority rule extended consensus tree using RAxML v8.2.10 (Stamatakis 2014).  
163 The Python script for performing this 'taxonomic bootstrapping' is available in Supplemental  
164 Materials on Dryad (*sample\_from\_taxonomy.py*).

165

166 *Time Calibration and Analysis of Diversification Rates*

167 To obtain a time-calibrated phylogeny, we first used BEAST v2.6.0 with fossils for previously  
168 inferred divergence events for families within Lamiales from the literature as calibration points  
169 to date the splits between lineages in the tribe Cheloneae (Vargas et al. 2014). To do this, we  
170 downloaded publicly available sequences for the ITS region for three pairs of species with fossils  
171 supporting their minimum divergence time: *Kigelia africana* (Bignoniaceae) + *Catalpa duclouxii*  
172 (Bignoniaceae) [28.4 mya], *Veronica persica* (Plantaginaceae) + *Plantago lanceolata*  
173 (Plantaginaceae) [11.6 mya], and *Gratiola neglecta* (Plantaginaceae) + *Bacopa eisenii*  
174 (Plantaginaceae) [5.3 mya]. We then combined the sequences from these six species with the ITS  
175 region for samples from Cheloneae (Wolfe et al. 2002, 2006). In addition, we included sequences  
176 for trnC-D and trnT-L for all included Cheloneae samples (Table S1). Each locus was aligned

177 with MAFFT (Katoh 2013) using the ‘--auto’ option and then all genes were concatenated with  
178 Phyutility (Smith and Dunn 2008).

179 Program settings for the analysis with BEAST were specified within BEAUti (Bouckaert  
180 et al. 2019). Each locus was given an independent substitution model (GTR + Gamma with four  
181 rate categories) and clock model (relaxed log-normal; Drummond et al. 2006) but were  
182 constrained to all follow a single tree topology. For the three fossil calibrations, we used log-  
183 normal distributions with the following ranges: mean = 3.346 and standard deviation = 0.2 (95%  
184 quantile range: 20.4–39.4 my) for *K. africana* + *C. duclouxii*; mean = 2.45 and standard  
185 deviation = 0.2 (95% quantile range: 8.34–16.1 my) for *V. persica* + *P. lanceolata*; and mean =  
186 1.667 and standard deviation = 0.2 (95% quantile range: 3.81–7.36 my) for *G. neglecta* + *B.*  
187 *eisnii*. All other prior specifications were left at their default options. Parameters were sampled  
188 for  $2 \times 10^7$  generations and were logged every 1,000 generations. Posterior samples were  
189 examined in Tracer v1.7.1 (Rambaut et al. 2018) to assess convergence and to estimate effective  
190 sample sizes (ESS). Results were then summarized into a maximum clade credibility (MCC) tree  
191 using TreeAnnotator after discarding 25% of the samples as burn in.

192 After estimating divergence times for the major Cheloneae lineages with BEAST, we  
193 used three of the 95% highest posterior density estimates as secondary calibration bounds to date  
194 the entire 293 taxon RAxML phylogeny using treePL (Smith and O’Meara 2012). The secondary  
195 calibration points were defined for the most recent common ancestors for *Pennellinathus*  
196 *frutenscens* + *Chelone glabra* (4.375–19.04 my), *K. breviflora* + *P. montanus* (1.89–8.539 my),  
197 and *P. montanus* + *P. personatus* (1.419–6.416 my). We first ran treePL with the ‘prime’ option  
198 to find the best optimization settings. Then, we used these settings, along with the ‘thorough’  
199 option, to estimate divergence times across the tree.

200 Using this time-calibrated phylogeny, we also estimated diversification rates with  
201 BAMM v2.5.0 (Rabasky 2014). Priors for the expectedNumberOfShifts, lambdaInitPrior,  
202 lambdaShiftPrior, and muInitPrior distributions were set using the setBAMMprior function in the  
203 BAMMtools R package v2.1.7 (Rabosky et al. 2014). All other priors were left at their default  
204 value. We then sampled parameters for  $1 \times 10^6$  generations, logging them every 1,000  
205 generations. After discarding 10% of the samples as burn-in, the remaining posterior samples  
206 were then processed in R v3.6.1 (R Core Team 2019) using the coda package (Plummer et al.  
207 2006) to assess convergence and the BAMMtools package to summarize estimated rate shifts,  
208 net diversification rates, and sampled placements of shifts on the phylogeny. We also estimated  
209 diversification dynamics using MEDUSA v1.41 (Alfaro et al. 2009), implemented in the R  
210 package geiger v2.0.6.4 (Pennell et al. 2014), assuming a birth-death model.

211

### 212 *Analysis of Biogeographic Distribution*

213 To estimate biogeographic patterns in *Penstemon*, we used BioGeoBEARS v1.1.2 (Matzke  
214 2013a) to infer ancestral areas as well as to compare competing biogeographic hypotheses using  
215 model selection criteria (e.g., Akaike information criterion, AIC; Akaike 1974). Within  
216 BioGeoBEARS, we fit the DIVALIKE (Ronquist 1997), DEC (Ree and Smith 2008), and  
217 BAYAREALIKE (Landis et al. 2013) models, along with their jump dispersal (“+J”)   
218 counterparts, for a total of six models (Matzke 2013b, 2014). Areas were defined initially by the  
219 12 regions from Wolfe et al. (2006) with updates based on the physiographic regions of North  
220 America (Fig. S1; Table 2; Barton et al. 2003). These were split into three separate sets to help  
221 with computational feasibility and to reflect geographic proximity of regions. The first set of  
222 analyses included areas [1-6], the second set included areas [4-7,11,12], and the third set

223 Table 2. Biogeographic regions for *Penstemon* (modified from Wolfe et al. 2006) used in Figure 1, and  
224 for BioGeoBears analyses.  
225

| <b>Region Description</b>                                       | <b>Designation</b> |
|-----------------------------------------------------------------|--------------------|
| Intermontane Plateau – extreme north                            | 1                  |
| Pacific Northwest, exclusive of Eastern and Western Cordilleras | 2                  |
| Cascade-Sierra and Northwestern Cordillera                      | 3                  |
| Southwestern Cordillera                                         | 4                  |
| Intermountain Region                                            | 5                  |
| Eastern Cordillera                                              | 6                  |
| Great Plains                                                    | 7                  |
| Interior Lowlands                                               | 8                  |
| Appalachian Mountain System                                     | 9                  |
| Coastal Plains                                                  | 10                 |
| American Southwest                                              | 11                 |
| Mexican Highlands                                               | 12                 |

226

227

228 included areas [6-11]. The maximum number of ancestral areas for each analysis was set as the  
229 maximum number of areas currently occupied by the sampled taxa in a given set and all other  
230 parameters were kept at their default values. R code for running these analyses is available on  
231 dryad.

232 To further dissect evolutionary pattern and process for *Penstemon*, we also downloaded  
233 distribution information for every species of *Penstemon* available in the SEINet data portal  
234 (<http://www.swbiodiversity.org>). Only Federally- or State-listed species were excluded from our  
235 data set because these locations are restricted from public access. This information was collected  
236 as Keyhole Markup Language (KML) files which were then imported into Google Earth Pro  
237 (<https://www.google.com/earth/versions/#earth-pro>). Using our time-calibrated phylogeny, we  
238 plotted two patterns in Google Earth Pro: 1) the individual patterns of distribution of taxa from  
239 the earliest to most recently diverged lineages, and 2) a collective distribution map based on time  
240 of divergence estimations for the terminal lineages in each clade (Table S2). These time slices  
241 were 2.5 mya, 2.0 mya, 1.8 mya, and forward to 0.1 mya in 100,000-year increments. The time

242 of divergence was rounded up or down to fit into a time increment. Animations of the  
243 distributions in these two map sets were assembled from the individual or collective map images.  
244 The pattern of these species' distributions was then examined in the context of inferred glaciation  
245 cycles during the Pleistocene (Ehlers and Gibbard 2007; Ehlers et al. 2018).

246

## 247 RESULTS

248

### 249 *Amplicon Sequencing*

250 Of the 48 loci targeted for sequencing, 43 were successfully amplified in a sufficient number of  
251 our samples and were used for downstream analyses (Table S1; see filtering criteria in the  
252 Appendix 2 in Supplement Materials). Our final data matrix contained 17,518 sites (7171  
253 variable, 4049 parsimony informative), 293 taxa (282 from *Penstemon*), and 30.4% missing data.  
254 The average number of non-missing sites per taxon was 12,191.2.

255

### 256 *Phylogenetic Inference*

257 Tribe Cheloneae is circumscribed by the genera *Pennellianthus*, *Collinsia*, *Keckiella*, *Chelone*,  
258 *Nothochelone*, *Chionophila*, and *Penstemon*. Our phylogeny based on 43 nuclear genes  
259 recovered a topology for the tribe consistent with earlier studies (Fig. 1; Wolfe et al. 2002, 2006),  
260 but with higher relative nodal support throughout the tree, and greater resolution within clades  
261 and along the backbone. Relationships among early diverging lineages in *Cheloneae* in this study  
262 also agree with previous work and support *Penstemon* as monophyletic with *Chionophila*  
263 *tweedyi* as sister to the entire genus (prior >0.8) (Fig. 1a).

264           Within *Penstemon*, we infer subgenus *Dasanthera* as monophyletic, as has also been  
265 found previously (Wolfe et al. 2002, 2006). Major differences between the phylogeny presented  
266 here and earlier studies include the well-resolved placement of subgenus *Dasanthera* as sister to  
267 the rest of the genus (Fig. 1a position 1), the position of *P. personatus* (subg. *Cryptostemon*; Fig.  
268 1a position 2) as the next diverging lineage, a strongly supported clade containing the rest of the  
269 genus (referred to below as the crown clade; Fig 1a position 3), strong support for the majority of  
270 the group of penstemons classified as subgenus *Saccanthera* (Fig. 1a position 4; Freeman 2019),  
271 affinities for sect. *Penstemon* subsections *Proceri* and *Humiles* (Fig. 1b position 5), strong  
272 support for sect. *Penstemon* subsect. *Penstemon* to include subsections *Multiflori* and *Tubaeflori*  
273 (Fig. 1b position 6), and strong support for the majority of taxa traditionally in sect. *Ericopsis*  
274 (Fig. 1c position 7). *Penstemon dissectus* is the first diverging lineage for remaining group of  
275 penstemons (Fig. 1c position 8). Additional differences are the moderate to strong support for  
276 much of the backbone for the clade of penstemons sister to *P. dissectus* (Figs. 1c–1f). A clade  
277 consisting of section *Coerulei* and species from sections *Gentianoides* and *Glabri* has strong  
278 nodal support (Fig. 1d position 12). There is strong support for section *Fasciculus* (Fig. 1e  
279 position 13), and resolution of groups within the terminal clade (Fig. 1f) with moderate to strong  
280 bootstrap support. Membership of this clade is consistent with the inclusion of members of sect.  
281 *Gentianoides* with previous studies (Wessinger et al. 2016). However, our study shows members  
282 of *Habroanthus* as part of this terminal clade, also. The remaining taxa in *Habroanthus* group in  
283 a clade that includes members of subgenus *Penstemon* sections *Coerulei* and *Gentianoides* (Fig.  
284 1f position 14), which is sister to a clade containing members of subgenus *Penstemon* sections  
285 *Peltanthera* and *Gentianoides*. Relative nodal support was moderate to strong within the  
286 *Peltanthera/Gentianoides* clade (Fig. 1f position 15) but was mostly lacking or moderate in the

287 traditional clade representing subgenus *Habroanthus*. There was no taxonomic distinction to  
288 separate the red-flowered subg. *Habroanthus* sect. *Elmigera* from sect. *Glabri* (Fig. 1f position  
289 14).

290

291 Figure 1. Phylogeny of *Penstemon* and related members of Cheloneae based on the Astral  
292 analysis. Relative branch lengths are shown on the right. The vertical bar with lettering refers to  
293 insets 1a–1f, which show details of the phylogenetic tree.

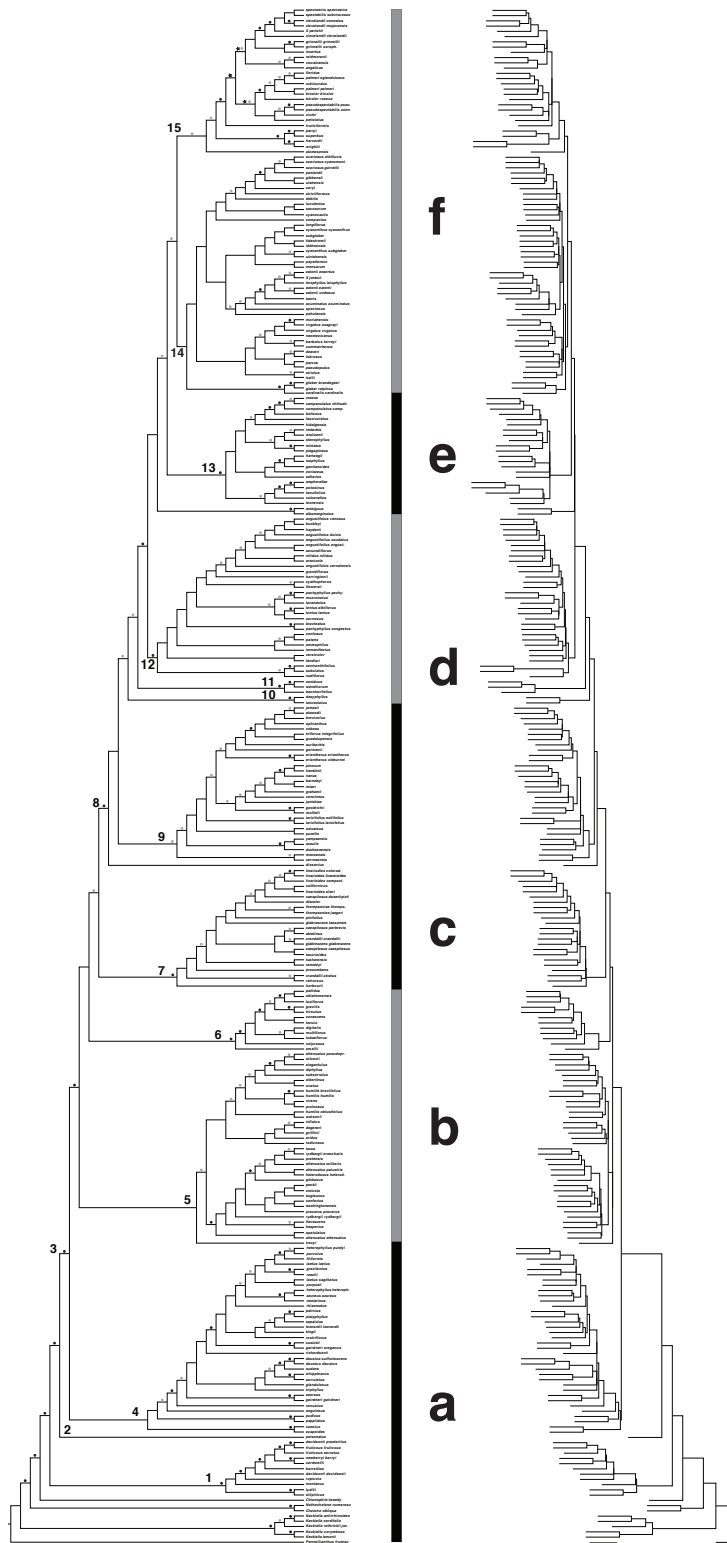



a)

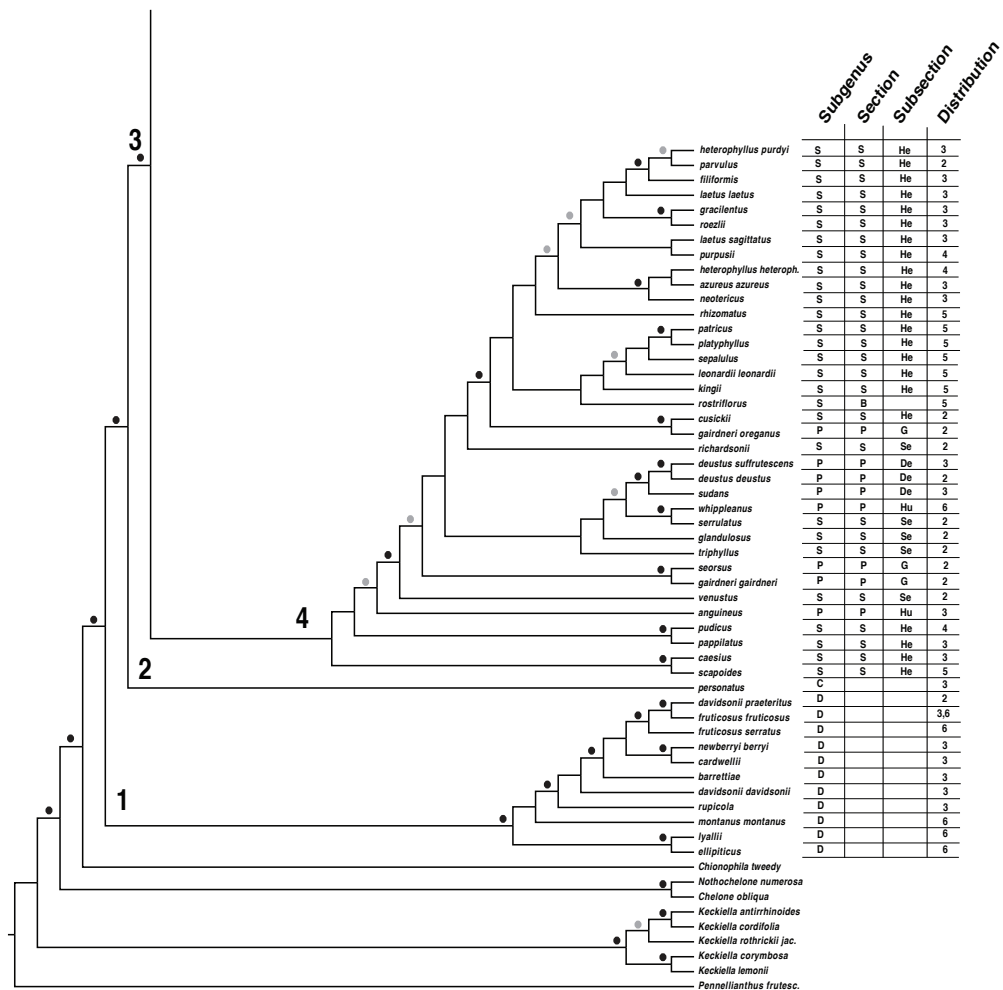

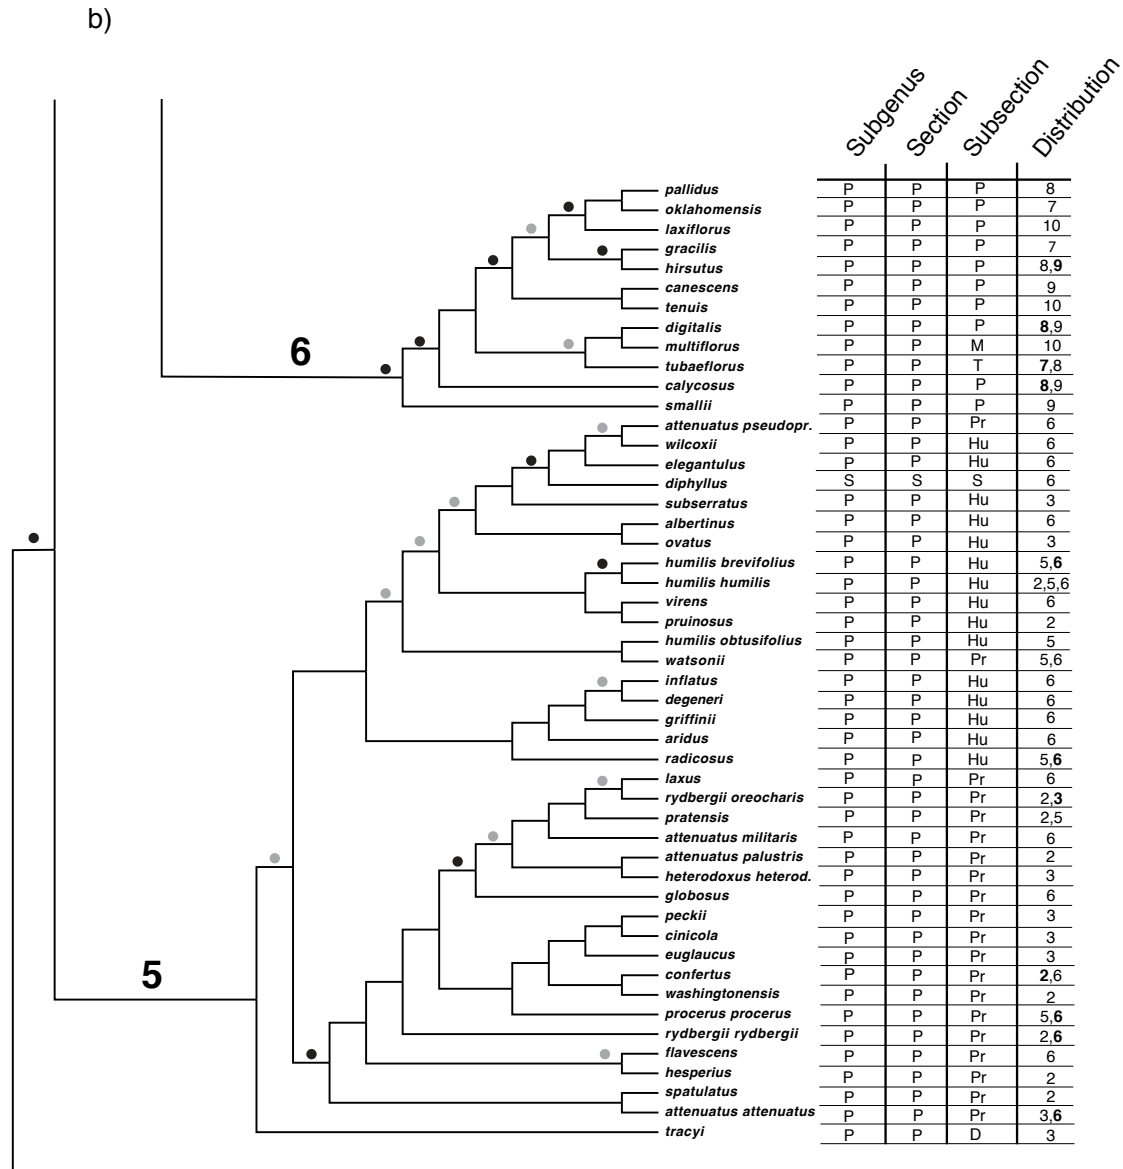

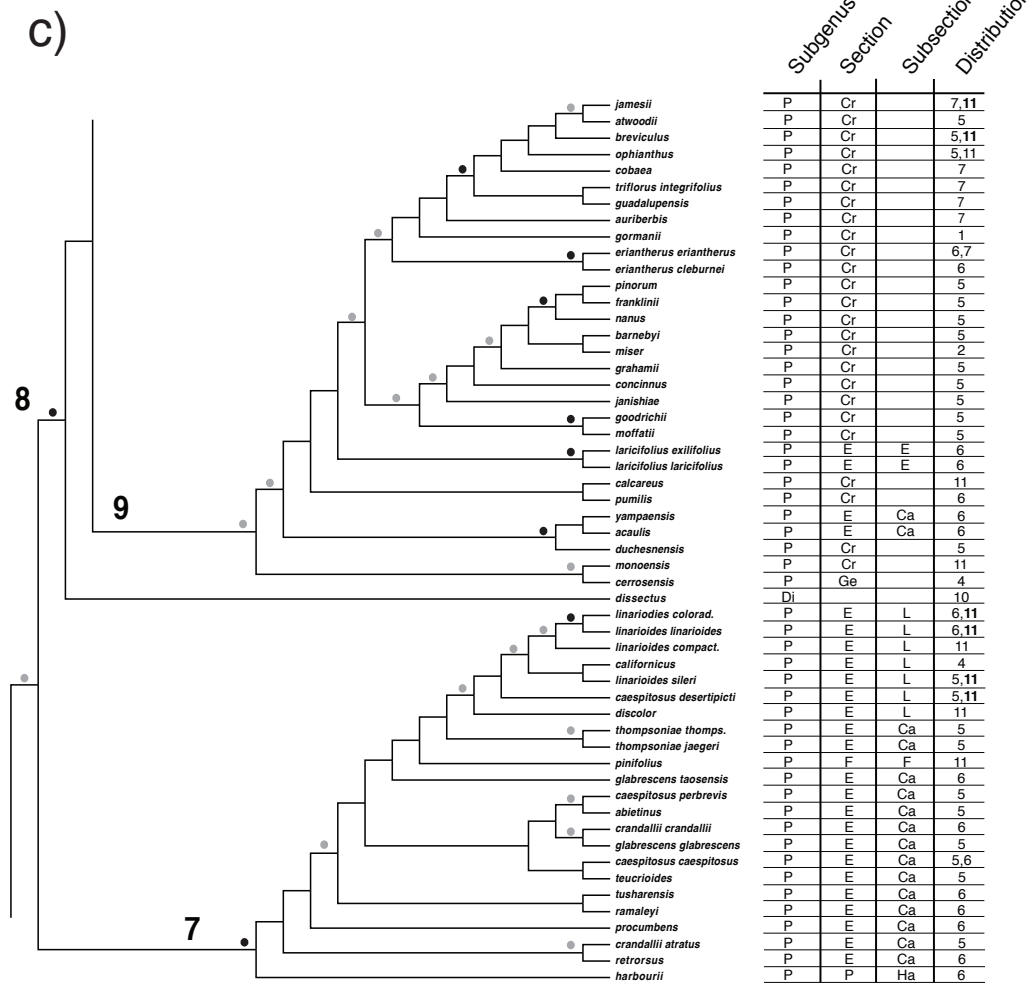

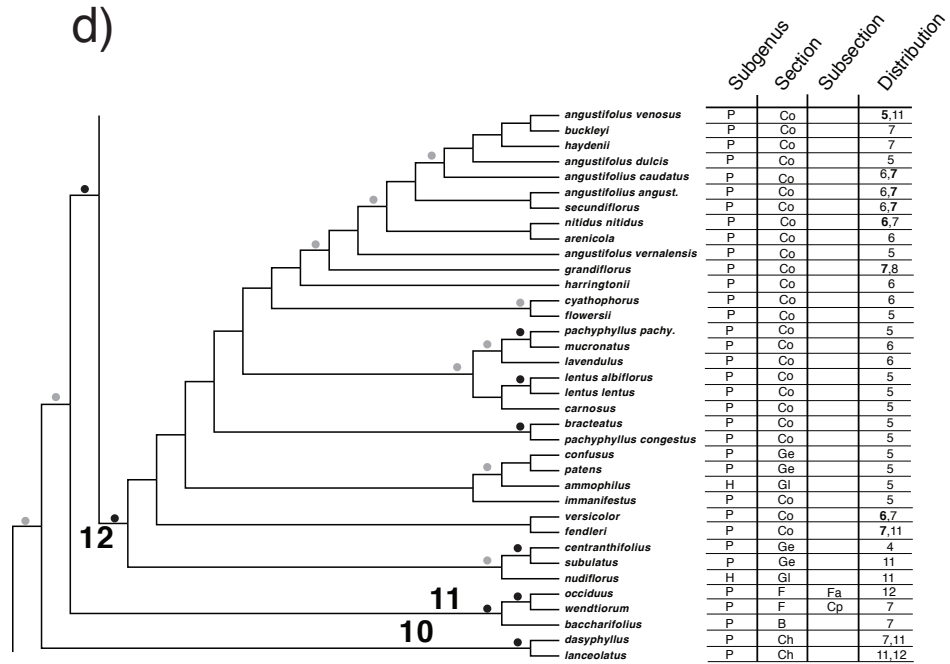

e)

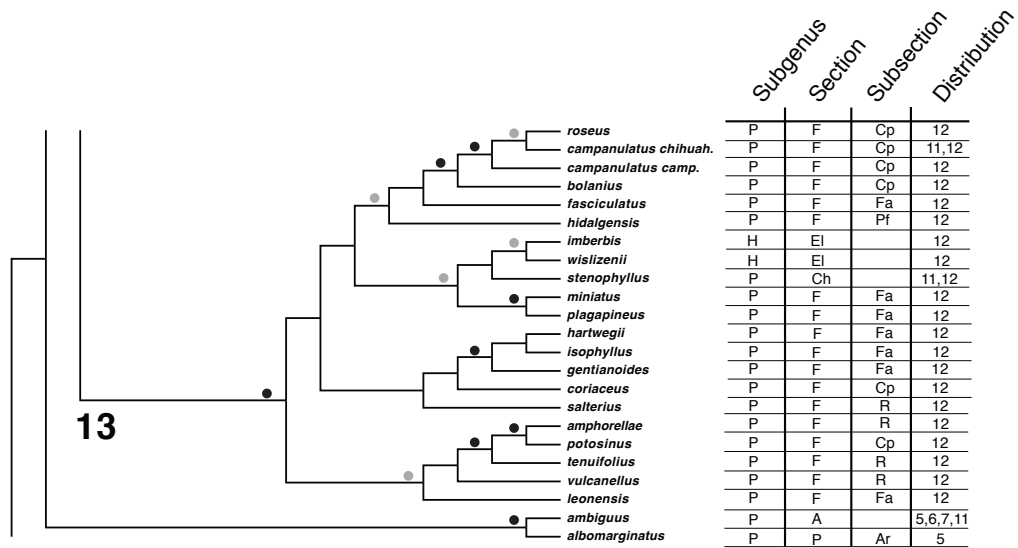



301  
302 *Taxonomic Bootstrap*  
303 Three analyses were conducted to test the taxonomic circumscription of the genus: 1) subgenus,  
304 2) section, and 3) subsection (Fig. 2). In the subgenus taxonomic bootstrap (Fig. 2a), support for  
305 the backbone is robust, and shows strong support for the major groupings recognized in  
306 *Penstemon*, except for the relationship among taxa in subgenera *Penstemon* and *Habroanthus*.  
307 The pattern of relationships among subgenera are as follows: subg. *Dasanthera* as the earliest  
308 diverging lineage and sister to a clade containing all the other subgenera. Subgenus  
309 *Cryptostemon* is sister to the core group of penstemons, and there is strong support for the  
310 grouping of taxa within subg. *Saccanthera*. It is important to note that this is a test of the current  
311 classification of major groups, and not the phylogenetic tree for the genus. However, the general  
312 order of branching for major groups matches those seen in the 43-gene phylogeny presented in  
313 Figure 1, and this is the same pattern seen for the section and subsection bootstrap analyses.  
314 For the section bootstrap analysis (Fig. 2b), the earliest diverging lineages show the same robust  
315 support as the 43-gene phylogeny, and sections within subg. *Saccanthera* are strongly supported  
316 as sister taxa. Support for taxa grouping in all recognized sections of the rest of *Penstemon* is  
317 nonexistent, but the support for subg. *Dissecti* as sister to what Wessinger et al (2016, 2019)  
318 refer to as the “crown group” of *Penstemon* has strong nodal support.

319 The subsection bootstrap analysis (Fig. 2c) reveals that current classification for the  
320 genus is not well supported by phylogenetic relationships. The topology of the early diverging  
321 lineages is concordant with the overall phylogeny (Fig. 2c nodes 1, 2, and 3). In this analysis,  
322 subgenus *Saccanthera* does not hold together as a monophyletic group but is grouped with  
323 members of subg. *Penstemon* sect. *Penstemon* (Fig. 2c node 5), which is sister to three of the

324 four subsections of sect. *Ericopsis* (Fig. 2c node 6). The topology of the latter group has strong  
325 bootstrap support. The monotypic sect. *Penstemon* subsect. *Harbouriani* is grouped with two  
326 subsections of sect. *Ericopsis* (Fig. 2c. node 6), which is consistent with the Wolfe et al. (2006)  
327 study and our 43-nuclear-gene tree (Fig. 1). Subgenus *Penstemon* sect. *Penstemon* is  
328 polyphyletic in the subsection bootstrap tree (Fig. 2c nodes 4 and 8). The relationship among  
329 subsections for the group representing members of subg. *Saccanthera*, subsects. *Deusti*,  
330 *Gairdneri*, *Humiles*, *Proceri*, *Caespitosi*, *Linarioides*, and *Harbouriani* to the rest of *Penstemon*  
331 has strong nodal support (Fig. 2c node 7). Three of the sect. *Penstemon* subsections are united by  
332 strong bootstrap support (Fig. 2c node 8). The position of subg. *Dissecti* is unresolved in the  
333 subsection bootstrap analysis (Fig. 2c node 9), but sect. *Ericopsis* subsect. *Ericopsis* is strongly  
334 supported as grouped with sect. *Cristati* (Fig. 2c. node 10). Taxonomic affinities for sect.  
335 *Coerulei* are uncertain (Fig. 2c node 11), but there is strong support for an affinity between sect.  
336 *Penstemon* subsect. *Arenarii* and sect. *Ambiguii* (Fig. 2c node 12). The subsection topology for  
337 the crown clade of *Penstemon* (Fig. 2c node 13) is not well resolved. Subsections of sect.  
338 *Fasciculus* are grouped with a bootstrap value of 50 (Fig. 2c node 14). However, two of the  
339 subsections group with strong support (Fig. 2c node 15). Subgenus *Habroanthus* sections *Glabri*  
340 and *Elmigera* have no bootstrap support (Fig. 2c, node 16), and relationships among what the  
341 American Penstemon Society refers to as sect. *Peltanthera*, which includes subsect.  
342 *Centranthifolii* (sect. *Gentianooides*), subsect. *Havardiani* (sect. *Gentianooides*), subsect.  
343 *Peltanthera* (sect. *Spectabiles*), and subsect. *Petiolati* (sect. *Spectabiles*) are grouped at node 17  
344 of Figure 2c. The only group in this clade with strong support consists of subsect. *Peltanthera*  
345 and *Petiolati* (Fig. 2c node 18).  
346



347 Figure 2. Taxonomic bootstrap results for a) subgenera, b) sections, and c) subsections.

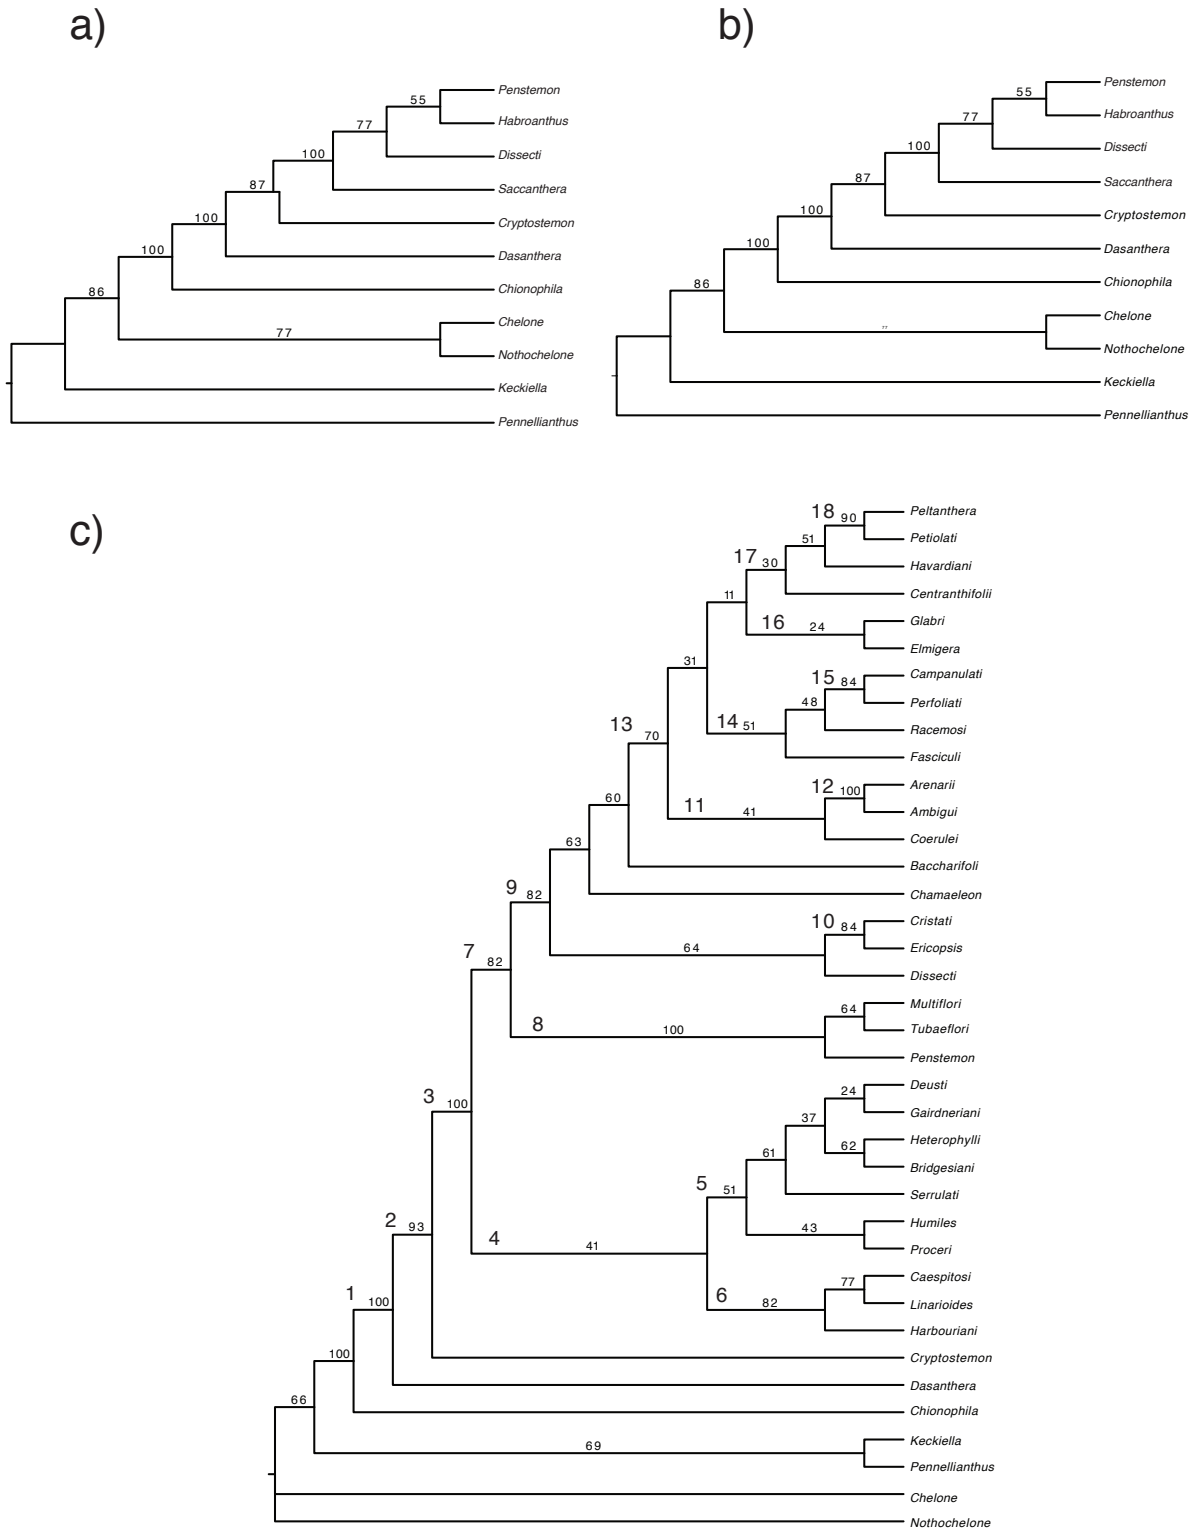

349 *Time Calibration and Analysis of Diversification Rates*

350 Divergence dating with BEAST using three fossils with minimum age estimates for members of  
351 the families Bignoniaceae and Plantaginaceae produced a well-supported phylogeny for the  
352 Cheloneae, with all sampled parameters having ESS values greater than 200 and no signs of a  
353 lack of convergence in the trace plots (Fig. 3). Based on this time calibration, we infer the age of  
354 the tribe to be 10.85 my (95% HPD interval: 4.375–19.04 my), with an estimated age for the  
355 origin of *Penstemon* 3.62 mya (95% HPD interval: 1.419–6.416). Using the 95% HPD intervals  
356 for these two age estimates as secondary calibration points, plus a third calibration point for  
357 members of the Cheloneae without *Pennellianthus*, we were able to time calibrate our entire 293-  
358 taxon phylogeny with treePL. Dates inferred by treePL were slightly older for the origin of the  
359 tribe (14.94 mya) but remained roughly the same for the origin of *Penstemon* (3.66 mya). The  
360 divergence for the crown clade of *Penstemon* (excluding subg. *Dasanthera* and *P. personatus*)  
361 was placed at 2.51 mya, demonstrating that the majority of the diversification within *Penstemon*  
362 has occurred since the early Pleistocene.

363

364 Figure 3. Time-calibrated tree for Cheloneae and *Penstemon* based on fossils for members of  
365 Lamiales. Dark circles mark nodes that were calibrated using fossils from Vargas et al. (2014). Grey  
366 squares mark nodes that were used as secondary calibration points for dating the entire 293-taxon  
367 phylogeny with treePL.

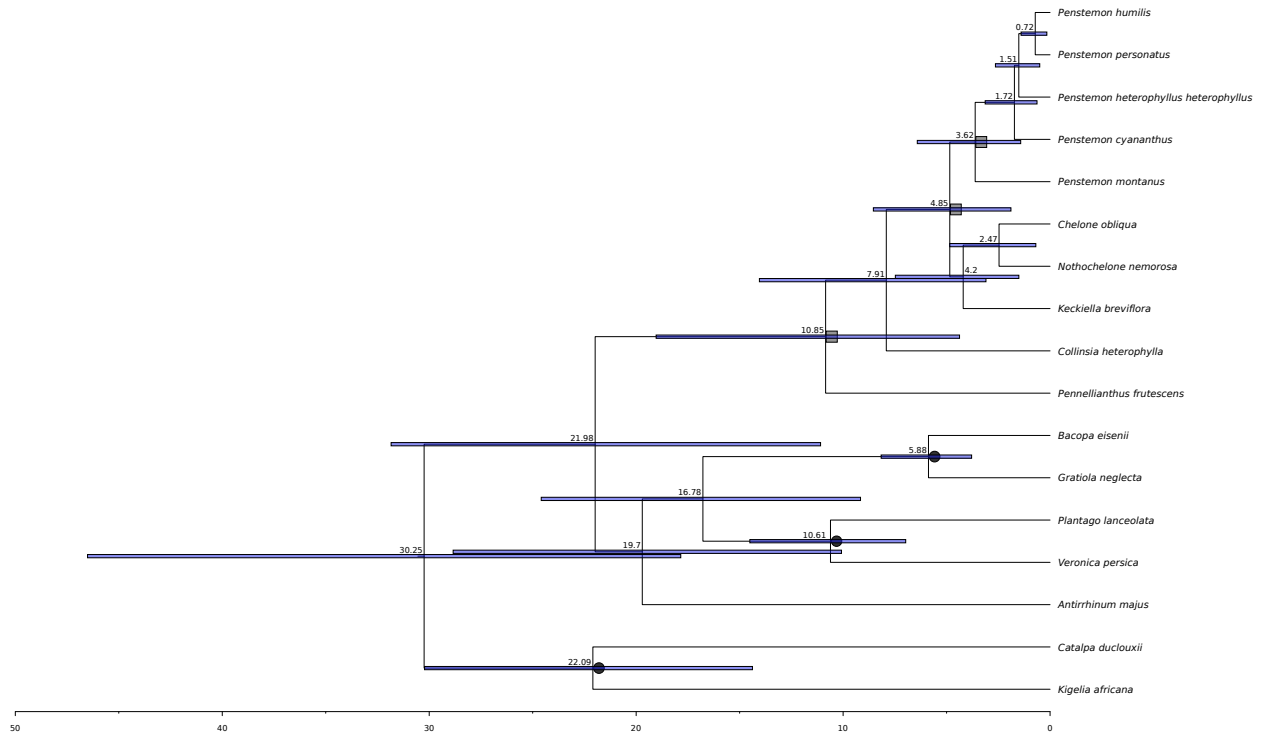

368

369

370

371

372

373

374

375

376

377

378

379

380

381

Diversification analyses with BAMM and MEDUSA inferred similar patterns of macroevolutionary dynamics, showing a large increase in speciation rate at the base of *Penstemon* (Fig. 4). There was also some support in the posterior sample in BAMM for the placement of this shift in diversification at the base of the crown clade of *Penstemon* (Fig. S2). However, regardless of placement, both analyses support a single shift in diversification rate over more complex models with multiple shifts. While there is still a fair amount of controversy regarding the analysis of speciation and extinction rates from time-calibrated, molecular phylogenies (Moore et al. 2016; Louca and Pennell 2020), this result is consistent with the hypothesis from Wolfe et al. (2006) that *Penstemon* is a recent and rapid evolutionary radiation.

382 Figure 4. Inferred patterns of diversification using BAMM. The phylogeny shows the  
383 reconstructed rates of net diversification inferred across the tree with a single shift in  
384 diversification (best shift configuration) at the base of *Penstemon*. The top inset plot shows the  
385 distribution of net diversification rates for the entire phylogeny and the bottom inset plot shows  
386 the inferred net diversification rate through time for Cheloneae without *Penstemon* (left), the  
387 Cheloneae with *Penstemon* (center), and *Penstemon* alone (right).  
388  
389

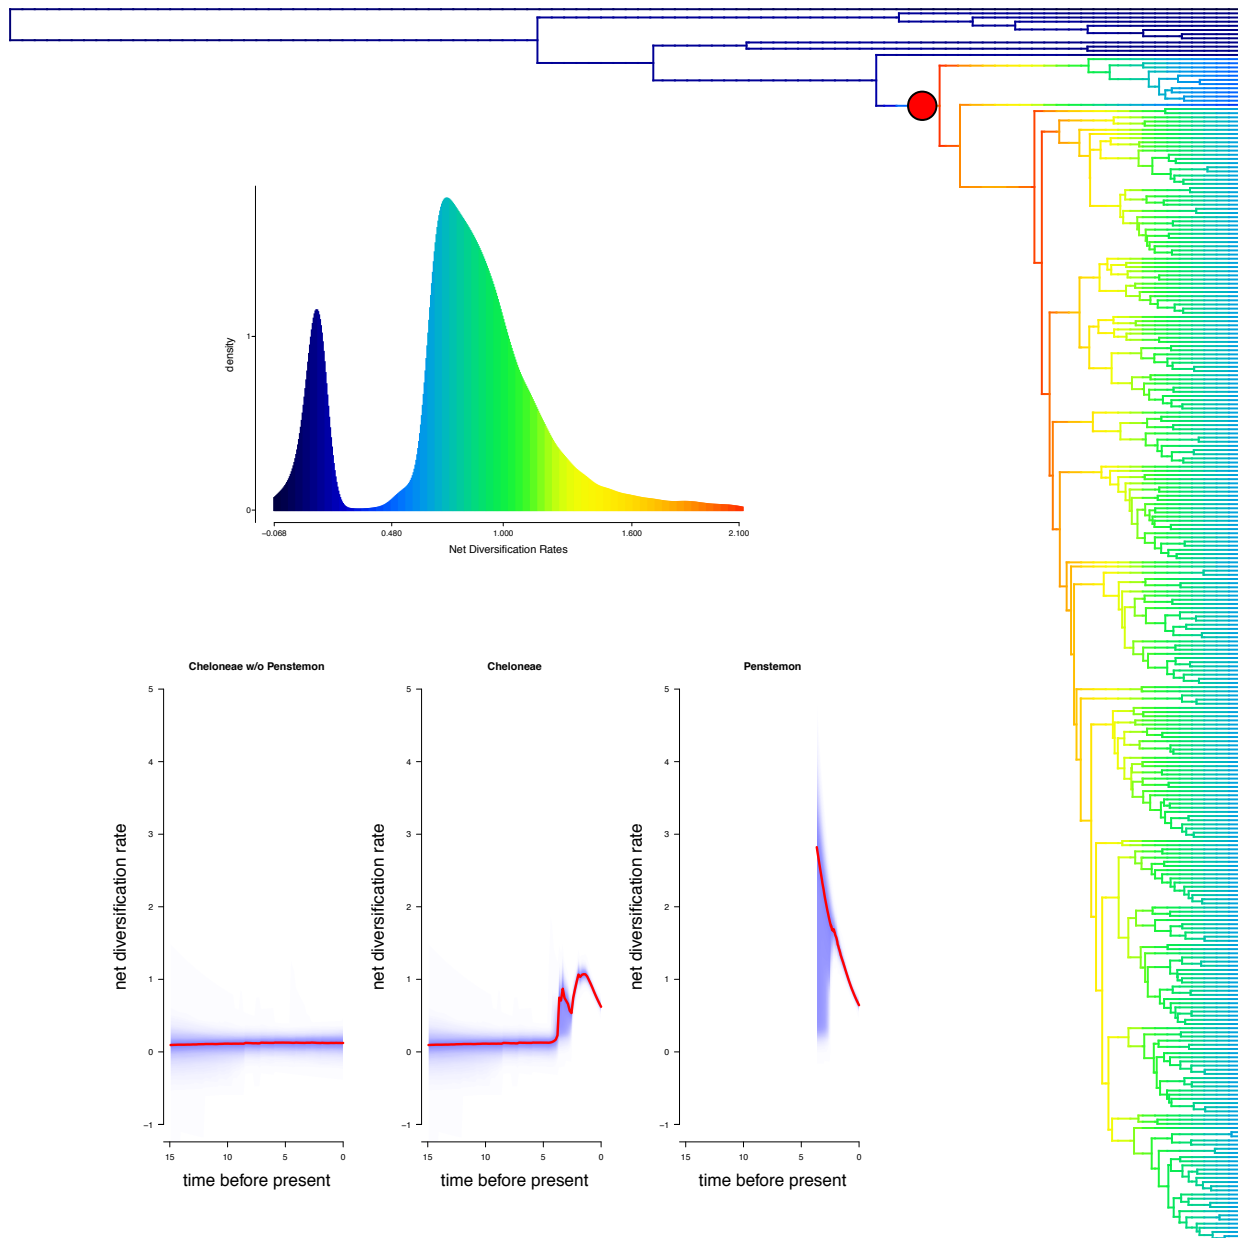

390

391

392 *Biogeographic Distribution*

393 Analyses with BioGeoBEARS consistently chose the BAYAREALIKE+J model as the best fit  
 394 for all three sets of areas (Table 3; Fig. S3). The DEC+J and DIVALIKE+J models were also  
 395 either the second or third best models, demonstrating that founder-event speciation events were

396

397 Table 3. Model comparison results for BioGeoBEARS analyses.

|       | <b>Model</b>   | <b>Log-Likelihood</b> | <b>AICc Weight</b> | <b>d</b> | <b>e</b> | <b>j</b> |
|-------|----------------|-----------------------|--------------------|----------|----------|----------|
| Set 1 | BAYAREASLIKE+J | -372.4                | 0.59               | 0.019    | 1e-7     | 0.039    |
|       | DEC+J          | -372.9                | 0.38               | 0.023    | 1e-12    | 0.036    |
|       | DIVALIKE+J     | -375.6                | 0.025              | 0.026    | 1e-12    | 0.036    |
|       | DEC            | -442.5                | 6.2e-31            | 0.053    | 0.038    | 0        |
|       | BAYAREALIKE    | -446.9                | 7.2e-33            | 0.023    | 0.52     | 0        |
|       | DIVALIKE       | -449.7                | 7.0e-34            | 0.068    | 0.024    | 0        |
| Set 2 | BAYAREALIKE+J  | -424.0                | 0.92               | 0.032    | 1.0e-07  | 0.033    |
|       | DEC+J          | -426.5                | 0.079              | 0.039    | 1.0e-12  | 0.029    |
|       | DIVALIKE+J     | -431.8                | 0.0004             | 0.042    | 1.0e-12  | 0.029    |
|       | DEC            | -479.6                | 1.9e-24            | 0.061    | 0.012    | 0        |
|       | BAYAREALIKE    | -489.1                | 1.4e-28            | 0.022    | 0.54     | 0        |
|       | DIVALIKE       | -492.1                | 6.9e-30            | 0.078    | 1.0e-12  | 0        |
| Set 3 | BAYAREALIKE+J  | -160.3                | 1.0                | 0.0072   | 0.0028   | 0.030    |
|       | BAYAREALIKE    | -250.9                | 1.4e-39            | 0.013    | 0.26     | 0        |
|       | DEC+J          | -378.3                | 2.1e-95            | 0.10     | 1.0e-12  | 0.025    |
|       | DIVALIKE+J     | -385.8                | 1.3e-98            | 0.11     | 1.0e-12  | 0.025    |
|       | DEC            | -388.5                | 2.4e-99            | 0.11     | 1.0e-12  | 0        |
|       | DIVALIKE       | -402.7                | 1.7e-105           | 0.13     | 0.016    | 0        |

398

399 likely to be an important process during the diversification of *Penstemon*. For ‘+J’ models,  
 400 estimates of the rate of dispersal, extinction, and founder-events were all fairly consistent across  
 401 sets of analyses, with extinction rates estimated to be close to 0. For analyses without the  
 402 founder-event parameter, estimates of these rates varied more greatly. In particular, the  
 403 BAYAREALIKE model tended to infer a higher extinction rate by almost an order of magnitude  
 404 when founder-event speciation was not modeled. Despite this variation, ancestral area

405 reconstruction for these analyses placed the most likely origin of *Penstemon* in the Eastern  
406 Cordillera (region 6), which agrees with previous hypotheses (Wolfe et al. 2002, 2006).

407         One hundred sixty-five distribution map images were assembled across the phylogeny of  
408 *Penstemon* from this study. Individual images are in Figure S4, and the collective maps for the  
409 100,000-year time slices inferred from a dated tree are in Figure S5. The time slices were  
410 inferred from the dated tree for the genus (Fig. S6). Animations of these maps in the order of  
411 appearance for either the clade position or the time slice can be seen at  
412 [https://www.youtube.com/watch?v=IMLn7Gq\\_ZPw](https://www.youtube.com/watch?v=IMLn7Gq_ZPw). Biogeographic regions (Fig. S1, Table 2)  
413 for taxa were determined by the distribution of populations shown in the individual KML files  
414 collected from the SEINet data portal ([www.swbiodiversity.org](http://www.swbiodiversity.org)). These regions were mostly  
415 based on the physiographic regions of North America (Barton et al. 2003) and were modified  
416 from Wolfe et al. (2006) to better reflect digitized collection data.

417

418 DISCUSSION

419

420 *Phylogenetic Inference and Time Calibration*

421 This study is the most comprehensive phylogenetic analysis of *Penstemon* to date, with 239 of  
422 ca. 285 species included. Previous studies have established that this genus represents a large  
423 continental radiation of recent origin. Our time calibration and divergence time analyses confirm  
424 this pattern, with *Penstemon* originating around the Pliocene/Pleistocene boundary. Given the  
425 large number of species diverging in a relatively short amount of time, we estimate that  
426 *Penstemon* has one of the highest rates of diversification of any plant genus in a continental  
427 setting (Breitkopf et al. 2015; Schwery et al. 2015; Tank et al. 2015; Verboom et al. 2015;

428 Kriebel et al. 2019). We hypothesize that this may be due to a pattern of adaptive radiation,  
429 which will be examined thoroughly in another study.

430         The difference in resolution from phylogenetic analyses based on ITS and cpDNA  
431 (Wolfe et al. 2006), and the current 43-nuclear-gene loci is notable, but not surprising. One  
432 would expect better tree topology resolution with more data. However, with a relatively young  
433 genus such as *Penstemon*, it is also not surprising that relative nodal support is lacking in some  
434 areas of the tree, despite the use of a large dataset. The Wessinger et al. (2019) study with the  
435 largest number of taxa (120 total species, 104 species in the crown clade) included 2306 and  
436 2051 loci, respectively, with 72% and 68% missing data. A consensus locus was aligned “if there  
437 were at least 20 taxa per locus, no more than 50 SNPs and 8 indels per locus, and no more than 8  
438 shared heterozygous sites across samples” (Wessinger et al. 2019). The trees in Wessinger et al.  
439 (2016, 2019) had relatively strong nodal support along the backbone of the tree, strong bootstrap  
440 support in some terminal clades, but not complete resolution of relationships throughout the tree.  
441 Comparing nuclear-gene amplicon sequences to MSG SNP data is difficult, but there are areas of  
442 agreement between the phylogenies produced by these studies as well as areas where the  
443 topologies differ. The general patterns from the phylogenies are similar enough that where  
444 backbone support is not as strong in our 43-gene tree, but in agreement with the MSG SNP  
445 results, we infer that the clade topologies represent relationships as shown in our results (Figs.  
446 1c–1f).

447         Patterns of genealogical discordance and rapid rates of evolution are also apparent in our  
448 data, as evidenced by the short branches in the ASTRAL-III tree (Figs. 1, S7). Given the recent  
449 radiation of the group, such patterns are expected and are likely a result of incomplete lineage  
450 sorting caused by rapid speciation. Other processes such as hybridization and allopolyploidy



451 have also been documented in *Penstemon* (Keck 1945; Wolfe et al. 1998a,b; Broderick et al.  
452 2011) and further complicate the accurate inference of phylogeny where they occur. However,  
453 the coalescent branch lengths in the ASTRAL-III tree (Figs. 1, S7) indicate that high levels of  
454 discordance are more prevalent towards the tips of the tree, with little evidence of discordance  
455 among the major lineages of the Cheloneae. In general, it is important to consider the effect of  
456 these sources of discordance on downstream inferences. For the analyses we conducted here  
457 (divergence dating, diversification, and biogeography), we are primarily focused on nodes deeper  
458 in the phylogeny that are less affected by the incongruence seen in other parts of our tree.  
459 Because of this, we argue that our results regarding the timing and diversification of the genus  
460 are robust, especially considering the agreement between our work and previous studies, as well  
461 as our dense sampling and the comparatively low amount of missing data in our analyses.

462 Our inferred timing for the biogeographic and diversification history (Table S2) of  
463 *Penstemon* in the Pliocene/Pleistocene supports previous hypotheses regarding its spread across  
464 North America during these epochs' dynamic periods of glaciation (Wolfe et al. 2006, Ehlers and  
465 Gibbard 2007; Ehlers et al. 2018). And while the age we infer for *Penstemon* places its origin  
466 slightly farther back in time than previously thought (3.66 Mya versus ~2.5 Mya; Wolfe et al.  
467 2006), the timing of divergence for the majority of species in the crown clade still coincides with  
468 the onset of the Pleistocene. Absent more closely related fossils than those from Vargas et al.  
469 (2014) at the family level, our divergence dating with secondary calibration points represents the  
470 only fossil-based divergence estimation conducted for the tribe. This time-calibrated phylogeny  
471 was crucial for understanding the pattern and timing of diversification, showing that *Penstemon*  
472 not only diversified at a much higher rate than other members of Cheloneae (Fig. 4) but that the  
473 shift in diversification rate occurred at the base of the clade, coinciding with its inferred origin in

474 the Eastern Cordillera and subsequent dispersal through founder events across the continent.  
475 Compared with other groups of angiosperms, the net diversification rate for *Penstemon* is  
476 consistent with estimates for the Lamiales (Magallón and Sanderson 2002; Magallón and Castillo  
477 2009); however, *Penstemon* is noteworthy as a particularly exceptional radiation when  
478 considering that its diversity has arisen in only the last 3.66 My, with the bulk of diversification  
479 occurring within the past 1.8 My. And while criticisms of diversification analyses are continuing  
480 to raise important considerations for the interpretability of absolute estimates of diversification  
481 dynamics (Moore et al. 2016; Louca and Pennell 2020), especially with regard to extinction  
482 rates, the relative pattern of rapid diversification in *Penstemon* compared to its sister lineages  
483 remains clear.

484

#### 485 *Taxonomic Implications*

486 Taxonomic bootstrapping of the subgenera, sections, and subsections of *Penstemon* reveals some  
487 interesting patterns, which speak to the need for taxonomic revision of the genus. In the  
488 subgenus taxonomic bootstrap (Fig. 2a), the traditional categories for subg. *Dasanthera*,  
489 *Cryptostemon*, *Saccanthera*, and *Dissecti* are not in conflict. The low bootstrap value for the  
490 node representing subgenera *Penstemon* and *Habroanthus* indicates some taxonomic conflict  
491 with placement of taxa in these categories. The taxonomic bootstrap of sections (Fig. 2b) shows  
492 the same early branching pattern support for *Dasanthera*, *Cryptostemon*, and the grouping of  
493 sections within subg. *Saccanthera*. Indications of taxonomic conflict occur throughout the  
494 remainder of the tree as evidenced by low to moderate bootstrap values for all nodes beyond  
495 subg. *Saccanthera*.

496           The subsection bootstrap analysis (Fig. 2c) yields insights into current taxonomic  
497 structure of the genus. Nodes 1–3 show the same strong support for the early diverging lineages  
498 (subg. *Dasanthera* and subg. *Cryptostemon* relationship and their placement as sister to the rest  
499 of the genus). Node 4 reveals conflict in taxonomic placement of some taxa within subgenera  
500 *Saccanthera* and *Penstemon*, particularly with the inclusions of subg. *Penstemon* sect.  
501 *Penstemon* subsections *Deusti* and *Gairdneri* with sections and subsections of subg.  
502 *Saccanthera*. Low bootstrap values for the node representing sect. *Penstemon* subsections  
503 *Humiles* and *Proceri* also indicate taxonomic problems within those groups. Node 6 indicates  
504 that two of the subsections of section *Ericopsis* are well defined, but these also group with the  
505 monotypic sect. *Penstemon* subsect. *Harbouriani*. Three of the subsections of section *Penstemon*  
506 have high nodal support (Fig. 2c, Node 8). Other indicators of taxonomic conflict are represented  
507 by nodes 10 (placement of sect. *Ericopsis* subsect. *Ericopsis* as sister to sect. *Cristati*), 12 (sect.  
508 *Penstemon* subsect. *Arenarii* as sister to sect. *Ambiguii*), 14 (low nodal support for taxa within  
509 section *Fasciculus*), 16 (no support for subg. *Habroanthus* sections *Glabri* and *Elmigera*), and 17  
510 (placement of taxa within section *Gentianioides* with no nodal support).

511           In the context of the phylogeny presented here (Fig. 1), clearly there is a need to revise  
512 the circumscription of the genus *Penstemon*. Similar patterns of taxa grouping outside their  
513 assigned sections and subsections have been seen in other recent studies with subsets of species  
514 (Wessinger et al. 2016, 2019). Based on the current study, together with the Wessinger et al  
515 studies (2016, 2019), the number of subgenera should be decreased from six to four: *Dasanthera*,  
516 *Cryptostemon*, *Saccanthera*, and *Penstemon*. The traditional subgenus *Habroanthus* should be  
517 designated as a section, sans designated subsections *Glabri* and *Elmigera*. The traditional  
518 monotypic subgenus *Dissecti*, should be section *Dissecti*, given its phylogenetic placement (Fig.

519 1c). Many taxa need to be shuffled from their traditional assigned subgenera, subsections, or  
520 sections to other groupings. Recommended changes based on phylogenetic studies can be found  
521 in Table S3.

522

### 523 *Biogeography*

524 Biogeographic analysis of *Penstemon* with BioGeoBEARS (Fig. S3) confirmed previous  
525 hypotheses for the origin of the genus in the eastern Cordillera of North America and its  
526 subsequent spread across the continent (Straw 1966; Wolfe et al. 2002). The importance of  
527 founder-event speciation for this process is demonstrated here for the first time, indicating that  
528 dispersal to new, ancestrally unoccupied areas was a key mechanism for the evolution and  
529 expansion of *Penstemon*. Given the dynamic nature of glaciation in North America during the  
530 diversification of the genus (see more details below), this pattern makes sense and is likely  
531 connected with the recurrent formation of “sky islands” in western and southwestern North  
532 America (Rehfeldt 1999; Knowles 2001; Hewitt 2004). As with our analyses of diversification  
533 with BAMM and MEDUSA, we find that the inferred rate of extinction is effectively zero for the  
534 most well-supported models. However, we do note that the inference of extinction rates from  
535 molecular phylogenies can be problematic (Rabosky 2010; Louca and Pennell 2020), so we  
536 interpret this absence of extinction with caution, especially considering the paucity of fossil  
537 evidence to corroborate diversification patterns for the Cheloneae. Nevertheless, the consistent  
538 pattern of elevated net diversification in *Penstemon* and its probable connection with the  
539 importance of founder-event speciation as inferred by BioGeoBEARS helps point to a possible  
540 mechanism for its rapid radiation.

541           The mapped biogeographic patterns for *Penstemon* are associated with the glaciation  
542 cycles of the Pleistocene (Table S2, Figs. S4, S5;  
543 [https://www.youtube.com/watch?v=IMLn7Gq\\_ZPw](https://www.youtube.com/watch?v=IMLn7Gq_ZPw)). There were 13 major glaciations and nine  
544 minor glaciations during the 2.7 years of the Pleistocene (Ehlers et al. 2018). Although most  
545 biogeographic histories emphasize the effect of the last glacial maximum, we argue that each  
546 cycle of glaciation had an impact on the diversification of *Penstemon*. The first four major  
547 glaciations occurred between 2.7 mya and 2.0 mya. During that time frame the earliest diverging  
548 lineage, subgenus *Dasanthera*, spread through the northeastern cordillera into the Cascade-Sierra  
549 cordillera and Pacific Northwest. The next major glaciation occurred between 2.0–1.8 mya.  
550 During this timeframe, *P. dissectus*, endemic to Georgia, appears in the eastern coastal plain.  
551 Given the phylogenetic position of *P. dissectus* in the middle of the phylogenetic tree (Figs. 1c,  
552 S2), one can confidently infer that distribution of species was more widespread throughout the  
553 southern reaches of the North American continent, but that extinction events occurred during the  
554 first million years of the Pleistocene. This is supported in our BAMM analyses (Fig. 4) where  
555 diversification shows an early burst along the backbone of the phylogenetic tree, followed by a  
556 decrease and/or extinction as the genus evolved. Figure 4 also illustrates two periods of  
557 diversification for tribe Cheloneae including *Penstemon*. There was an initial burst followed by a  
558 dramatic decline in net diversification rate, and a second burst and decline corresponding with  
559 the phylogenetic time frame represented in Table S2.

560           Between 1.8 mya and 1.2 mya there was one major and four minor glaciation episodes.  
561 During this timeframe, most of the diversification was taking place in the eastern cordillera and  
562 intermountain region (Table S2), except for the appearance of *P. smallii* in the Appalachian  
563 region. Extension of *Penstemon* into the southwest region, southern Great Plains, and highlands

564 of Mexico had just begun. From 1.2 to 1.1 mya two major glaciation cycles took place. The  
565 diversification into regions shows a north-south oscillation from the Cascade-Sierra and eastern  
566 cordillera ranges as far north as Alaska, and into the southwest and Mexico highlands. The  
567 southern Great Plains in the west also showed activity as did the southern Intermountain Region.  
568 From 1.1 mya to 1.0 mya there was one minor glaciation. There appeared to be a pattern of  
569 diversification from the eastern Pacific Northwest, southeast into the eastern cordillera and  
570 western Great Plains, and east into the Intermountain region.

571         Diversification of *Penstemon* was most active between 1.0 mya to 0.5 mya (Table S2,  
572 Figs. S4, S5). During this time frame there were two major glaciations (0.9–0.8 mya and 0.7–0.6  
573 mya) and one minor glaciation (1.0–0.9 mya). During the latter time period, there was an  
574 expansion from the southern Cascade-Sierra and intermountain regions north and east into the  
575 eastern cordillera and northern Cascade-Sierra. In the east there was an expansion from the  
576 Appalachian region into the southern interior lowlands and eastern Great Plains, and expansion  
577 through the coastal plain. From the southeastern cordillera there was an expansion into the  
578 Intermountain Region, then southwest and back into the Eastern Cordillera. During the first  
579 major glaciation cycle of this time period, there was an expansion south from the Cascade-Sierra  
580 to the Southwest Cordillera and Baja California. This was concurrent with a trajectory from the  
581 Intermountain region into the Southwest and Southwest Cordillera. During the subsequent  
582 interglacial period, the diversification followed a track northward into the Eastern Cordillera and  
583 Intermountain Region, and south into the Mexico Highlands. There was also an expansion from  
584 the Eastern Cordillera into the Great Plains, and in the east, there was an expansion through the  
585 eastern interior lowlands and northward in the Appalachian region. During the second major  
586 glaciation of this period, there was another cycle of diversification to the south (Intermountain

587 region to Southwest, and Mexico Highlands), and diversification into the southern Great Plains.  
588 The next glacier-free 100,000 years had activity in the Pacific Northwest and Cascade-Sierra,  
589 and an eastward movement of diversification in the Great Plains. There was also diversification  
590 in the Interior Lowlands.

591 The diversification of *Penstemon* slowed down during the most recent 500,000 years,  
592 with four major glaciations and two minor glaciation cycles, including the Last Glacial  
593 Maximum period. During this time period, most of the action was in the southern areas of the  
594 North America continent, notably in the Intermountain Region, Southwest, Southwest Cordillera  
595 and Baja California, and the Mexico Highlands.

596

597 CONCLUSIONS

598

599 *Penstemon* is a remarkable genus in its rapid diversification into most ecological regions found  
600 in North America (Fig. S1). The diversification, phylogeny, and biogeographic history suggest a  
601 rapid evolutionary radiation throughout North America during the Pleistocene. The pulses of  
602 diversification associated with major and minor glaciation periods, in the context of the models  
603 supported by our BioGeoBEARS analyses, are consistent with the colonization of newly  
604 available ecological niches during interglacial cycles. Considering the immense diversity in  
605 corolla, anther, staminode, leaf, inflorescence, and habit morphology, taken together with the  
606 large amount of variation in habitats, it is likely that *Penstemon* has undergone an adaptive  
607 radiation in a continental setting.

608

609 FUNDING

610

611 This work was supported by a grant from the National Science Foundation under award DEB-  
612 145539 to A.D.W. and L.S.K.

613

614 ACKNOWLEDGEMENTS

615

616 The authors thank members of the Wolfe and Kubatko labs for comments that helped to improve  
617 this manuscript. We also thank N. Holmgren, M. Stevens, G. Moffit, past and current members  
618 of the Wolfe Lab, and members of the American Penstemon Society for help with collecting  
619 specimens. In addition, we thank the Wolfe Lab graduate and undergraduate students, past and  
620 current, for their assistance with DNA extractions, database management, and sequencing  
621 preparation. Without their dedicated contributions this study would never have been possible.

622

623 DATA AVAILABILITY

624

625 Raw sequencing reads, aligned DNA sequences, data matrices, tree files, and code for all  
626 analyses is available on Dryad (doi:XXXX).

627



628 REFERENCES

629

630 Akaike H. 1974. A new look at the statistical model identification. IEEE Transaction on

631 Automatic Control 19:716–723.

632 Alfaro M.E., Santini F., Brock C., Alamillo H., Dornburg A., Rabosky D.L., Carnevale G.,

633 Harmon L.J. 2009. Nine exceptional radiations plus high turnover explain species diversity in

634 jawed vertebrates. Proc. Natl. Acad. Sci. U.S.A. 106:13410–13414..

635 Barton K.E., Howell D.G, Vigil J.F. 2003. The North American Tapestry of Time and Terrain.

636 USGS Geologic Investigations Series map I-2781.

637 Blischak P.D., Latvis M., Morales-Briones D.F., Johnson J.C., Di Stilio V.S., Wolfe A.D., Tank

638 D.C. 2018. Fluidigm2PURC: automated processing and haplotype inference for double-

639 barcoded PCR amplicons. Appl. Plant Sci. 6:e1156.

640 Blischak P.D., Wenzel A.J., Wolfe A.D. 2014. Gene prediction and annotation in *Penstemon*

641 (Plantaginaceae): a workflow for marker development from low-coverage genome

642 sequencing. Appl. Plant Sci 2:1400044.

643 Bouckaert R., Vaughan T.G., Barido-Sottani J., Duchêne S., Fourment M., Gavryushkina A., et

644 al. 2019. BEAST 2.5: An advanced software platform for Bayesian evolutionary analysis.

645 PLoS Comput. Biol. 15:e1006650.

646 Breitkopf H.R., Onstein E., Cafasso D., Schlüter P.M., Cozzolino S. 2015. Multiple shifts to

647 different pollinators fueled rapid diversification in sexually deceptive *Ophrys* orchids. New

648 Phytol. 207:377-389.

649 Broderick S.R., Stevens M.R., Geary B., Love S.L., Jellen E.N., Dockter R.B., Daley S.L.,

650 Lindgren D.T.. 2011. A survey of *Penstemon*'s genome size. Genome 54:160–173.

- 651 Chifman J., Kubatko L.S. 2014. Quartet Inference from SNP Data Under the Coalescent Model.  
652 *Bioinformatics* 30:3317–3324.
- 653 Crosswhite F.S. 1967. Revision of *Penstemon* section *Habroanthus* (Scrophulariaceae) I:  
654 *Conspectus*. *Am. Midl. Nat.* 77:1-11.
- 655 Dockter, R. B. D. B. Elzinga, B. Geary, P J. Maughan, L. A. Johnson, d. Tumbleson, J.L. Franke,  
656 K. Dockter, and M. R. Stevens. 2013. Developing molecular tools and insights into the  
657 *Penstemon* genome using genomic reduction and next-generation sequencing. *BMC Genet.*  
658 14: 66.
- 659 Drummond, A.J, S. Y. W. Ho, M. J. Phillips, and A. Rambaut. 2006. Relaxed Phylogenetics and  
660 Dating with Confidence. *PLoS Biol.* 4: e88.
- 661 Edgar, R. C. 2004. MUSCLE: multiple sequence alignment with high accuracy and high  
662 throughput. *Nucleic Acids Res.* 32: 1792–1797.
- 663 Ehlers, J. and P. L. Gibbard. 2007. The extent and chronology of Cenozoic Global Glaciation.  
664 *Quat. Int.* 164-165: 6–20.
- 665 Ehlers, J., P. L. Gibbard, and P. D. Hughes. 2018. Quaternary glaciations and chronology. *In:*  
666 *Past Glacial Environments (Second Edition)*, eds. J. Menzies and J. J. M. van der Meer.  
667 Elsevier, Ltd., Amsterdam, Netherlands. pp. 77-101.
- 668 Estes, D. 2012. *Penstemon kralii* (Plantaginaceae), a new species from Alabama and Tennessee,  
669 with an updated key to the southeastern U.S. *Taxa. J. Bot. Res. Inst. Texas* 6: 1-18.
- 670 Freeman, C. E. 2019. *Penstemon*. *In:* *Flora of North America* Editorial Committee, eds. 1993+.  
671 *Flora of North America North of Mexico*. 21+ vols. New York and Oxford. Vol. 17, pp 82–  
672 255.
- 673 Hewitt, G. M. 2004. Genetic consequences of climatic oscillations in the Quaternary. *Philos.*

- 674 Trans. R. Soc. London, Ser. B 359: 183–195.
- 675 Holmgren, N. H. 1984. *Penstemon*. In A. Cronquist, A. H. Holmgren, N. H. Holmgren, J. L.  
676 Reveal, and P. K. Holmgren [eds.], Intermountain flora: vascular plants of the intermountain  
677 west, vol. 4, 370-457. New York Botanical Garden, Bronx, New York, USA.
- 678 Holmgren, N. H., and P. K. Holmgren. 2016. Intermountain flora. Vascular plants of the  
679 intermountain West, U.S.A. Volume Seven. Potpourri: keys, history, authors, artists,  
680 collectors, beardtongues, glossary, indices. New York Botanical Garden, New York, New  
681 York. 312 pages.
- 682 Katoh, S. 2013. MAFFT multiple sequence alignment software version 7: Improvements in  
683 performance and usability. *Mol. Biol. Evol.* 30: 772–780.
- 684 Kearse, M., R. Moir, A. Wilson, S. Stones-Havas, M. Cheung, S. Sturrock, S. Buxton, et al.  
685 2012. Geneious Basic: an integrated and extendable desktop software platform for the  
686 organization and analysis of sequence data. *Bioinformatics* 28: 1647–1649.
- 687 Keck, D. D. 1945. Studies in *Penstemon*—VIII. A cytotaxonomic account of the section  
688 *Spermunculus*. *Am. Midl. Nat.* 33: 128–206.
- 689 Knowles, L. L. 2001. Did the Pleistocene glaciation promote divergence? Tests of explicit  
690 refugial models in montane grasshoppers. *Mol. Ecol.* 10: 691-701.
- 691 Kriebel, R., B. T. Drew, C. P. Drommond, J. G. González-Gallegos, F. Celep, M. M. Mahdjoub,  
692 J. P. Rose, C-L. Xiang, G-X. Hu, J. B. Walker, E. M. Lemmon, A. R. Lemmons, and K. J.  
693 Sytsma. 2019. Tracking temporal shifts in area, biomes, and pollinators in the radiation of  
694 *Salvia* (sages) across continents: leveraging anchored hybrid enrichment and targeted  
695 sequence data. *Am. J. Bot.* 106: 573-597.
- 696 Landis, M. J., N. J. Matzke, B. R. Moore, and J. P. Huelsenbeck. 2013. Bayesian Analysis of

- 697 Biogeography when the Number of Areas is Large. *Syst. Biol.* 62: 789–804.
- 698 Lindgren, D., and E. Wilde. 2003. Growing penstemons: species, cultivars and hybrids.  
699 American Penstemon Society, Infinity Publishing, Haverford, PA.
- 700 Lodewick K., and R. Lodewick. 1987. *Penstemon* nomenclature. American Penstemon Society,  
701 Eugene, OR.
- 702 Louca, S., and M. W. Pennell. 2020. Extant timetrees are consistent with a myriad of  
703 diversification histories. *Nature* 580: 502–505.
- 704 Magallón, S., and M. J. Sanderson. 2002. Absolute diversification rates in angiosperm clades.  
705 *Evolution* 55: 1762–1780.
- 706 Magallón, S., and A. Castillo. 2009. Angiosperm diversification through time. *Am. J. Bot.* 96:  
707 349–365.
- 708 Matzke, N. J. 2013a. BioGeoBEARS: BioGeography with Bayesian (and Likelihood)  
709 Evolutionary Analysis in R Scripts. University of California, Berkeley. Berkeley, CA.
- 710 Matzke, N. J. 2013b. Probabilistic historical biogeography: new models for founder-event  
711 speciation, imperfect detection, and fossils allow improved accuracy and model-testing.  
712 *Frontiers in Biogeography* 5: 242–248.
- 713 Matzke, N. J. 2014. Model Selection in Historical Biogeography Reveals that Founder-event  
714 Speciation is a Crucial Process in Island Clades. *Syst. Biol.* 63: 951–970.
- 715 Moore, B. R., S. Höhna, M. R. May, B. Rannala, and J. P. Huelsenbeck. 2016. Critically  
716 evaluating the theory and performance of Bayesian analysis of macroevolutionary mixtures.  
717 *Proc. Natl. Acad. Sci. U.S.A.* 113: 9569–9574.
- 718 O’Kane, S. L. Jr., and K. D. Heil. 2014. *Penstemon bleaklyi* (Plantaginaceae), a new high-  
719 elevation species from north-central New Mexico. *Phytoneuron* 2014-61: 1-4.

- 720 Pennell, F. W. 1935. The Scrophulariaceae of eastern temperate North America. Academy of  
721 Natural Sciences of Philadelphia, Philadelphia, Pennsylvania, USA.
- 722 Pennell, M. W., J. M Eastman, G. J. Slater, J. W. Brown, J. C. Uyeda, R. G. FitzJohn, M. E.  
723 Alfaro, and L. J. Harmon. 2014. geiger v2.0: an expanded suite of methods for fitting  
724 macroevolutionary models to phylogenetic trees. *Bioinformatics* 30: 2216–2218.
- 725 Plummer, M., N. Best, K. Cowles, and K. Vines. 2006. CODA: Convergence Diagnosis and  
726 Output Analysis for MCMC. *R News* 6: 7–11.
- 727 Price, M.N., P. S. Dehal, and A. P. Arkin. 2010. FastTree 2 – Approximately Maximum-  
728 Likelihood Trees for Large Alignments. *PLoS ONE* 5: e9490.
- 729 R Core Team. 2019. R: A language and environment for statistical computing. R Foundation for  
730 Statistical Computing, Vienna, Austria. URL <https://www.R-project.org/>.
- 731 Rabosky, D. L. 2010. Extinction rates should not be estimated from molecular phylogenies.  
732 *Evolution* 64: 1816–1824.
- 733 Rabosky, D. L. 2014 Automatic Detection of Key Innovations, Rate Shifts, and Diversity-  
734 Dependence on Phylogenetic Trees. *PLoS ONE* 9: e89543.
- 735 Rabosky, D.L., M. Grundler, C. Anderson, P. Title, J. J. Shi, J. W. Brown, H. Huang, and J. G.  
736 Larson. 2014. BAMMtools: An R package for the analysis of evolutionary dynamics on  
737 phylogenetic trees. *Methods Ecol. Evol.* 5: 701–707.
- 738 Rambaut, A., A. J. Drummond, D. Xie, G. Baele, and M. A. Suchard. 2018. Posterior  
739 Summarization in Bayesian Phylogenetics Using Tracer 1.7. *Syst. Biol.* 67: 901–904.
- 740 Ree, R. H., and S. A. Smith. 2008. Maximum Likelihood Inference of Geographic Range  
741 Evolution by Dispersal, Local Extinction, and Cladogenesis. *Syst. Biol.* 57: 4–14.
- 742 Rehfeldt, G. E. 1999. Systematics and genetic structure of *Ponderosae* taxa (Pinaceae) inhabiting

- 743 the mountain islands of the southwest. *Am. J. Bot.* 86: 741-752.
- 744 Rodríguez-Peña, R. A., R. L. Johnson, L. A. Johnson, C. D. Anderson, N. J. Ricks, K. M. Farley,  
745 M. D. Robbin, A. D. Wolfe, and M. R. Stevens. 2018. Investigating the genetic diversity and  
746 differentiation patterns in the *Penstemon scariosus* species complex under different sample  
747 sizes using AFLPs and SSR. *Conserv. Genet.* 19: 1335–1348.
- 748 Ronquist, F. 1997. Dispersal-Vicariance Analysis: A New Approach to the Quantification of  
749 Historical Biogeography. *Syst. Biol.* 46: 195–203.
- 750 Rothfels, C. J., K. M. Pryer, and F.-W. Li. 2017. Next-generation polyploid phylogenetics: rapid  
751 resolution of hybrid polyploid complexes using PacBio single-molecule sequencing. *New*  
752 *Phytol.* 213: 413–429.
- 753 Schmidel, C.C. 1763-1771: *Icones Plantarum*. ed. Keller. Fleischmann, Nürnberg.
- 754 Schwery, O. R. E. Onstein, Y. Bouchenak-Khelladi, Y. Xing, R. J. Carter, and H. P. Linder.  
755 2015. As old as the mountain: the radiations of the Ericaceae. *New Phytol.* 207: 355-367.
- 756 Smith, S. A., and C. Dunn. 2008. Phyutility: a phyloinformatics utility for trees, alignments, and  
757 molecular data. *Bioinformatics* 24: 715–716.
- 758 Smith, S. A., and B. C. O’Meara. 2012. treePL: divergence time estimation using penalized  
759 likelihood for large phylogenies. *Bioinformatics* 28:2689–2690.
- 760 Stamatakis, A. 2014. RAxML version 8: a tool for phylogenetic analysis and post-analysis of  
761 large phylogenies. *Bioinformatics* 30: 1312–1313.
- 762 Stamatakis, A., P. Hoover, and J. Rougemont. 2008. A rapid bootstrap algorithm for the RAxML  
763 web servers. *Syst. Biol.* 57: 758–771.
- 764 Stevens, M. R., S. L. Love, and T. McCammon. 2020. The heart of *Penstemon* country: a natural  
765 history of penstemons in the Utah region. Sweetgrass Books, Helena, MT. 394 pp.

- 766 Stone, B. W., A. Ward, M. Farenwald, A. Lutz, and A. D. Wolfe. 2019. Genetic diversity and  
767 population structure in Cary's Beardtongue, *Penstemon caryi* (Plantaginaceae), a rare plant  
768 endemic to the eastern Rocky Mountains of Wyoming and Montana. *Conserv. Genet.* 20:  
769 1149–1161.
- 770 Straw, R. M. 1956a. Adaptive morphology of the *Penstemon* flower. *Phytomorphology* 6: 112-  
771 119.
- 772 Straw, R. M. 1956b. Floral isolation in *Penstemon*. *Am. Nat.* 90: 47-53.
- 773 Straw, R. M. 1963. Bee-fly pollination of *Penstemon ambiguous*. *Ecology* 44: 818-819.
- 774 Straw, R. M. 1966. A redefinition of *Penstemon* (Scrophulariaceae). *Brittonia* 18: 80-95.
- 775 Tank, D. C., J. M. Eastman, M. W. Pennell, P. S. Soltis, D. E. Soltis, C. E. Hinchliff, J. W.  
776 Brown, E. B. Sessa, and L. J. Harmon. 2015. Nested radiations and the pulse of angiosperm  
777 diversification: increased diversification rates often follow whole genome duplications. *New*  
778 *Phytol.* 207: 454-467.
- 779 Turner, B. L. 2010. Taxonomy of the *Penstemon campanulatus* complex (Scrophulariaceae) and  
780 description of a new species from its midst. *Phytoneuron* 2010-31: 1-5.
- 781 Uribe-Convers, S., M. L. Settles, and D. C. Tank. 2016. A Phylogenomic Approach Based on  
782 PCR Target Enrichment and High Throughput Sequencing: Resolving the Diversity within  
783 the South American Species of *Bartsia* L. (Orobanchaceae). *PloS One* 11: e0148203.
- 784 USFWS (United States Fish and Wildlife Service). 1993. Endangered and threatened wildlife  
785 and plants; review of plant taxa for listing as endangered or threatened species. *Federal*  
786 *Register* 58: 51144–51180.
- 787 USFWS (United States Fish and Wildlife Service). 2011. Endangered and threatened wildlife  
788 and plants; designation of critical habitat for *Ipomopsis polyantha* (Pagosa Skyrocket) and

789 threatened status for *Penstemon debilis* (Parachute Beardtongue) and *Phacelia submutica*  
790 (DeBeque *Phacelia*). *Federal Register* 76: 45078–45128.

791 Vargas, P., L. M. Valente, J. L. Blanco-Pastor, I. Liberal, B. Guzman, E. Cano, A. Forrest, and  
792 M. Fernandez-Mazuecos. 2014. Testing the biogeographical congruence of palaeofloras  
793 using molecular phylogenetics: snapdragons and the Madrean–Tethyan flora. *J. Biogeogr.*  
794 41:932–943.

795 Verboom, G. A., N. G. Bergh, S. A. Haiden, V. Hoffman, and M. N. Britton. 2015. Topography  
796 as a driver of diversification in the Cape Floristic Region of South Africa. *New Phytol.* 207:  
797 368–376.

798 Wessinger, C. A., C. C. Freeman, M. E. Mort, M. D. Rauscher, and L. C. Hileman. 2016.  
799 Multiplexed shotgun genotyping resolves species relationships within the North American  
800 genus *Penstemon*. *Am. J. Bot.* 103: 912–922.

801 Wessinger, C. A., M. D. Rauscher, and L. C. Hileman. 2019. Adaptation to hummingbird  
802 pollination is associated with reduced diversification in *Penstemon*. *Evol. Lett.* 3: 521–533.

803 Wolfe, A. D. 2005. ISSR techniques for evolutionary biology. *Methods Enzymol.* 395: 134–144.

804 Wolfe, A. D., Q.-Y. Xiang, and S. R. Kephart. 1998a. Assessing hybridization in natural  
805 populations of *Penstemon* (Scrophulariaceae) using hypervariable intersimple sequence  
806 repeat (ISSR) bands. *Mol. Ecol.* 7: 1107–1125.

807 Wolfe, A. D., Q.-Y. Xiang, and S. R. Kephart. 1998b. Diploid hybrid speciation in *Penstemon*  
808 (Scrophulariaceae). *Proc. Natl. Acad. Sci. U.S.A.* 95: 5112–5115.

809 Wolfe, A. D., S. L. Datwyler, and C. P. Randle. 2002. A phylogenetic and biogeographic  
810 analysis of the Cheloneae (Scrophulariaceae) based on ITS and matK sequence data. *Syst.*  
811 *Bot.* 27: 138–148.



- 812 Wolfe, A. D., A. McMullen-Sibul, V. J. Tepedino, L. Kubatko, T. Necamp, and S. Fassnacht.  
813 2014. Conservation genetics and breeding system of *Penstemon debilis* (Plantaginaceae), a  
814 rare beardtongue endemic to oil shale talus in western Colorado, USA. *J. Syst. Evol.* 52:  
815 598–611.
- 816 Wolfe, A. D., T. Necamp, S. Fassnacht, P. Blischak, and L. Kubatko. 2016. Population genetics  
817 of *Penstemon albomarginatus* (Plantaginaceae), a rare Mojave Desert species of deep sand  
818 habitats. *Conserv. Genet.* 17: 1245–1255.
- 819 Wolfe, A. D., C. P. Randle, S. L. Datwyler, J. J. Morawetz, N. Arguedas, and J. Diaz. 2006.  
820 Phylogeny, taxonomic affinities, and biogeography of *Penstemon* (Plantaginaceae) based on  
821 ITS and cpDNA sequence data. *Am. J. Bot.* 93: 1699–1713.
- 822 Zacarías-Correa, A. G. 2020. Diversidad, estructura genética y modelos de distribución del  
823 género *Penstemon* (Plantaginaceae) en México. Ph.D. thesis, Instituto de ecología, Xalapa,  
824 Veracruz, México.
- 825 Zacarías-Correa, A. G., A. Lira-Noriega, E. Pérez-Calix, M.-S. Samain, and A. D. Wolfe. 2020.  
826 Back to the future of a rare plant species of the Chihuahuan desert: tracing distribution  
827 patterns across time and genetic diversity as a basis for conservation actions. *Biodivers.*  
828 *Conserv.* 29:1821–1840.
- 829 Zacarías-Correa, A. G., A. D. Wolfe, E. M. Salas, and M.-S. Samain. 2019. *Penstemon*  
830 *reidmoranii* (Plantaginaceae), a new species from Baja California. *Phytotaxa* 387: 63-70.
- 831 Zhang, C., M. Rabiee, E. Sayyari, and S. Mirarab. 2018. ASTRAL-III: polynomial time species  
832 tree reconstruction from partially resolved gene trees. *BMC Bioinf.* 19: 153.
- 833
- 834

835 Figure 1. Phylogeny of *Penstemon* and related members of Cheloneae based on the Astral  
836 analysis. Relative branch lengths are shown on the right. The vertical bar with lettering refers to  
837 insets 1a–1f, which show details of the phylogenetic tree.

838

839 Figure 2. Taxonomic bootstrap results for a) subgenera, b) sections, and c) subsections.

840

841 Figure 3. Time-calibrated tree for Cheloneae and *Penstemon* based on fossils for members of  
842 Lamiales. Dark circles mark nodes that were calibrated using fossils from Vargas et al. (2014). Grey  
843 squares mark nodes that were used as secondary calibration points for dating the entire 293-taxon  
844 phylogeny with treePL.

845

846 Figure 4. Inferred patterns of diversification using BAMM. The phylogeny shows the  
847 reconstructed rates of net diversification inferred across the tree with a single shift in  
848 diversification (best shift configuration) at the base of *Penstemon*. The top inset plot shows the  
849 distribution of net diversification rates for the entire phylogeny and the bottom inset plot shows  
850 the inferred net diversification rate through time for Cheloneae without *Penstemon* (left), the  
851 Cheloneae with *Penstemon* (center), and *Penstemon* alone (right).

852
